# Effects of phylogeny on coexistence in model communities

Carlos A. Serván<sup>1\*</sup>, José A. Capitán<sup>2</sup>, Zachary R. Miller<sup>1</sup> & Stefano Allesina<sup>1,3</sup>

<sup>1</sup>Department of Ecology & Evolution, University of Chicago, Chicago, IL, USA

<sup>2</sup>Complex Systems Group. Department of Applied Mathematics, Universidad Politécnica de Madrid, Av. Juan de Herrera, 6, 28040 Madrid, Spain

<sup>3</sup>Northwestern Institute on Complex Systems, Evanston, IL, USA

\*corresponding author e-mail: [cmarceloservan@uchicago.edu](mailto:cmarceloservan@uchicago.edu)

## Abstract

A species' traits influence the way in which it interacts with the environment. Thus, we expect traits to play a role in determining whether a given set of species coexists. Traits are, in turn, the outcome of an eco-evolutionary process summarized by a phylogenetic tree. Therefore, the phylogenetic tree associated with a set of species should encode information about the assembly properties of the community. Many studies have highlighted the potentially complex ways in which phylogenetic information is translated into species' ecological properties. However, much less emphasis has been placed on developing expectations for community properties under a particular hypothesis.

In this work, we couple a simple model of trait evolution on a phylogenetic tree with local community dynamics governed by Lotka-Volterra equations. This allows us to derive properties of the community of coexisting species as a function of the number of traits, tree topology and the size of the species pool. Our results highlight how phylogenies and traits, in concert, affect the coexistence of a set of species.

In this way, our work provides new baseline expectations for the ways in which phylogenetic information is reflected in the structure of and coexistence within local communities.

## Introduction

Gause's pioneering work [15] provided the first clear empirical evidence for the principle of competitive exclusion, which states that two species competing for a unique resource cannot coexist. In the context of niche theory, this principle resonates in the concept of limiting

21 similarity: In a community shaped only by biotic interactions, species with similar niches  
22 are less likely to coexist [26]. Making stronger assumptions, one can draw a direct link  
23 between evolutionary relatedness among the members of an ecological community and their  
24 co-occurrence patterns. In particular, if one is willing to assume that species' traits are  
25 well-described by phylogeny, and that similarity in traits maps into strength of competition  
26 between species, one can connect the phylogenetic structure of an ecological community with  
27 coexistence [37]. While this hypothesis has found mixed support [11], it has served as one of  
28 the cornerstones of the budding field of community phylogenetics [35, 38]. In recent years,  
29 several tools have been developed to test whether a given mechanism of community assembly  
30 (e.g., competitive exclusion or environmental filtering) has acted on a community, by analyzing  
31 the signal it is expected to leave in the community's phylogenetic structure [14]. However,  
32 some authors have noted that phylogenetic relatedness might affect community patterns in a  
33 variety of ways, obscuring a link between phylogenetic and co-occurrence patterns [11, 28].

34 Here we take a step back and analyze a model in which we incorporate an explicit link  
35 between phylogenetic relatedness and ecological interactions. In particular, we connect phy-  
36 logeny to species' traits, and then similarity in traits to the strength of interaction between  
37 any two species [4, 29]. Given a phylogenetic tree representing the evolutionary history of a  
38 regional pool of  $n$  species, we assume that species interactions are determined by a set of  $\ell \geq n$   
39 traits, which have evolved independently on the tree via Brownian motion [18]. Species are  
40 assumed to have a baseline competitive effect on each other, which is then modified according  
41 their trait covariance. In this way, species that are more closely related tend to interact, on  
42 average, more strongly with each other than with distantly-related species. As we will show,  
43 the variance of the distribution of interaction strengths is controlled by the number of traits  
44  $\ell$ .

45 Clearly, species' intrinsic growth rates could also reflect their evolutionary history (e.g.,  
46 closely related species with similar traits might find similar environments to be harsh or hos-  
47 pitable). To clearly separate the effect of phylogeny on interspecific interactions from its effect  
48 on growth rates, we therefore assume that all species have the same intrinsic growth rate. [5].  
49 This assumption severs any connection between phylogeny and environmental filtering.

50 Having established our model for trait evolution and the link between trait values and  
51 species interactions, we analyze the case in which all species in the pool are present at arbitrary

52 initial conditions, and dynamics follow the Generalized Lotka-Volterra model. Contrary to  
53 previous simulation-based studies [14, 23] we develop an analytical framework to characterize  
54 the resulting community of coexisting species, as a function of both the number of traits,  
55  $\ell$ , and the tree structure. In particular, we show that when the number of traits is large  
56 enough relative to the number of species in the pool, coexistence of all species is guaranteed  
57 by the tree-induced interaction structure. Furthermore, the abundance distribution of the  
58 community reflects the structure of the tree. On the other hand, while  $\ell = n$  is a well-known  
59 *necessary* condition for coexistence [24, 41], we find that full coexistence is almost never  
60 achieved in this case (see also [13]). Yet, even when coexistence of all  $n$  species is precluded,  
61 one typically observes coexisting communities of moderate size, as expected if interactions  
62 were purely random [10, 33]. Differently from the purely random case, here we find that the  
63 probability that a particular species survives is determined by its position in the tree.

64 Our model shows that phylogenetic relatedness, modulated by the number of traits con-  
65 trolling species interactions, affects multiple aspects of the local community. The explicit  
66 incorporation of community dynamics allows us to move from pairwise comparisons to global  
67 aspects of community structure. Furthermore, we advance the growing body of literature on  
68 random interaction models [3, 6, 10, 33] by analyzing a case in which the correlations between  
69 interaction strengths are controlled by phylogenetic relatedness.

## 70 Model

71 Consider a regional pool  $\mathcal{R} = \{s_i\}$  of  $n$  species indexed by  $1 \leq i \leq n$ , and assume that a  
72 species' identity is defined by its  $\ell \geq n$  trait values. For a given trait  $1 \leq j \leq \ell$ , collect  
73 the values of  $j$  for all members of the pool in the trait vector  $\tau_j \in \mathbb{R}^n$ . We sample each  
74  $\tau_j$  independently from a multivariate normal distribution  $\mathcal{N}(0, \Sigma)$ . This choice implies that:  
75 (a) the values for distinct traits of a given species are independent, and thus we are not  
76 considering trade-offs between traits; (b) the processes leading to the correlation structure  
77  $\Sigma$  are statistically equivalent for distinct traits; (c) lastly, if  $\Sigma_{ii} = \sigma$  for all  $i$ , then the  
78 distribution of trait values *within* a species is independent of species identity. For an example  
79 of an evolutionary process consistent with the assumptions above, consider the case in which  
80  $T_{\mathcal{R}}$  is the phylogenetic tree for the species in the regional pool, and each trait  $j$  starts at an

81 ancestral mean value of 0, and evolves independently on the tree via Brownian motion. Then  
82 the value of trait  $j$  at the  $n$  tips,  $\tau_j$ , follows the normal distribution  $\mathcal{N}(0, \Sigma)$  with  $\Sigma$  induced by  
83 the tree structure, and called the variance-covariance matrix of  $T_{\mathcal{R}}$  [18]. In  $\Sigma$ , the covariance  
84 between two species is given by the shared branch length on  $T_{\mathcal{R}}$  [9]. As such, whenever  $T_{\mathcal{R}}$   
85 is ultrametric, then  $\Sigma_{ii} = 1$  for all  $i$ . Unless otherwise specified, here  $\Sigma$  is always assumed to  
86 originate from an ultrametric, rooted phylogenetic tree (see Figures 1 and 2).

87 In this setting, each realization of the  $\ell$  traits defines a species pool  $\mathcal{R}$ . For a given  
88 pool, we imagine that the following experiment is performed [33]: all the species from the  
89 pool are introduced in the local habitat *at the same time* and at *arbitrary initial densities*.  
90 Population dynamics, as determined by the species' interactions and growth rates, will lead  
91 the community to an *asymptotic* state in which some of the species are extinct, while others  
92 coexist. Our aim is to characterize the resulting community of coexisting species in terms of  
93 the parameters  $\ell, n$  and  $\Sigma$ .

94 To this end, we consider dynamics governed by the Generalized Lotka-Volterra (GLV)  
95 model. Species are assumed to differ only in their interactions, so that the growth of each  
96 species in isolation is the same:

$$\frac{dx_i}{dt} = x_i(r - \sum_j (\mu + A_{ij})x_j). \quad (1)$$

97 Here,  $x_i$  is the density of species  $i$  and  $r$  is the common intrinsic growth rate. The  
98 interaction coefficients are modeled as deviations from a “mean-field” competition value  $\mu >$   
99 0. These deviations are controlled by trait similarity between species. More precisely, the  
100 deviations are modeled as the sample covariance matrix resulting from the trait sampling  
101 process, so that competition between two species is strengthened if their trait vectors are  
102 positively correlated and weakened otherwise:

$$\begin{aligned} A_{ij} &= \frac{1}{\ell} \sum_l \tau_l^i \tau_l^j, \\ G &= (\tau_j^i), \\ A &= \frac{1}{\ell} G G^T. \end{aligned} \quad (2)$$

103 In the supplementary information (section S1), we show how this model arises by assuming

104 a separation of time scales for consumer-resource models in which consumers share the same  
105 attack and death rates, but differ in their preferences for resources.

106 Under these assumptions,  $A$  is a symmetric and stable matrix, and a member of the  
107 *Wishart ensemble* [30, 40]:

$$A \sim \mathcal{W}_n\left(\frac{1}{\ell}\Sigma, \ell\right) \quad (3)$$

108 The Wishart distribution describes the probability with which a given *sample covariance*  
109 *matrix* is observed when sampling from a multivariate normal distribution. Given its many  
110 applications in statistics and other fields, the Wishart distribution has been studied exten-  
111 sively, allowing us to draw upon a large body of results [7, 8, 22, 30].

112 Since  $A$  is stable, the community reaches a unique, globally-stable equilibrium, and the  
113 sub-community of coexisting species is characterized by a feasibility and non-invasibility con-  
114 dition [20]. Importantly, in this case one can prove that the effect of the mean interaction  
115 strength  $\mu$  on the resulting community is relatively straightforward:  $\mu$  does not affect the  
116 identity of the coexisting species, and rescales their biomasses by a constant (see supplemen-  
117 tary information, section S6, for details). Similarly, any choice of  $r > 0$  only rescales the  
118 equilibrium biomasses. Thus, without loss of generality, we can assume  $\mu = 0$ , and  $r = 1$ , so  
119 that the regional pool is completely characterized by  $A$ .

120 To describe the statistical properties of the community of coexisting species, we need  
121 to condition the distribution of the variables of interest on the *unique* feasible and non-  
122 invisable sub-community for a given species pool  $\mathcal{R}$ . We focus on the following properties:  
123 the distribution of the number of coexisting species, the total biomass of the community, and  
124 the relative abundance distribution of the coexisting species.

125 To illustrate our results with an empirical tree structure, we take the phylogeny of the  
126 clade *Senna* (Fabales) as an example [39]. The tree contains a total of 94 species and we use  
127 the outlier group comprising the species *Senna silvestris var guarantica*, *Senna siamea*, *Senna*  
128 *polyantha* and *Senna galeottiana* to root the subtree containing the remaining 90 species.

129 Notice that, as shown by [32] the final community composition reached in each of our the-  
130 oretical experiments is the same as would be reached under sequential, one-at-a-time species  
131 invasions. Thus, our results map directly to the process of bottom-up assembly of ecological

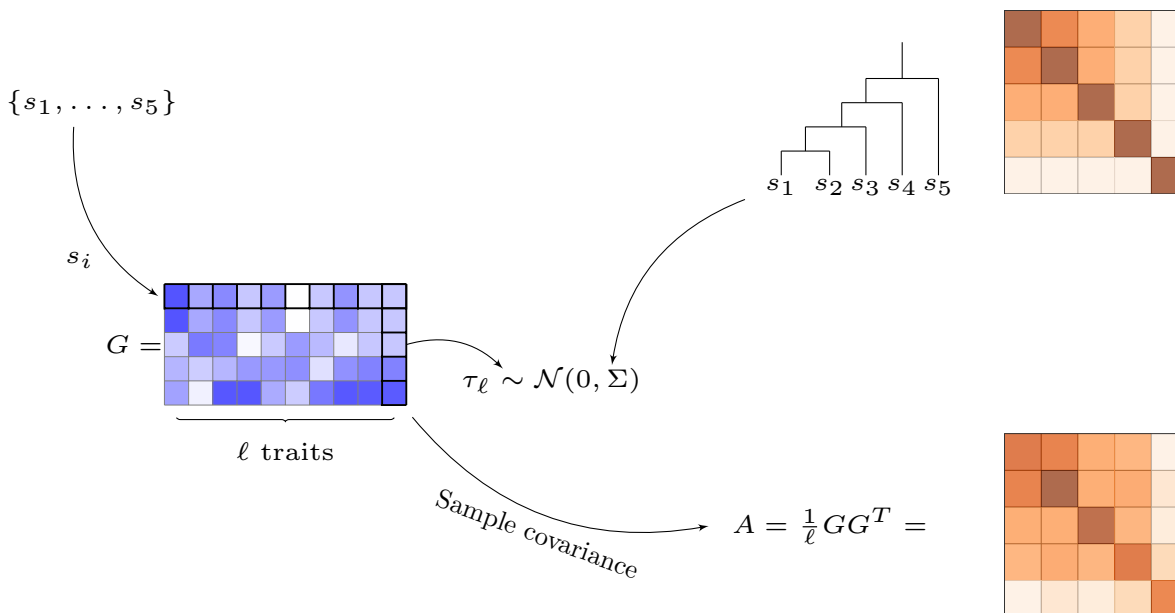

Figure 1: **Construction of the regional pool  $\mathcal{R}$  and interaction matrix  $A$ .** Each species in the pool  $\mathcal{R}$  is assigned  $\ell$  trait values. The vector containing the values for trait  $j$  ( $\tau_j \in \mathbb{R}^n$ ) of all members of the pool is sampled independently from  $\mathcal{N}(0, \Sigma)$ . This is equivalent to a neutral model of trait evolution for each  $j$  on a phylogenetic tree  $T_{\mathcal{R}}$ . The model relates the structure of  $T_{\mathcal{R}}$  to the interactions between the species in the pool: the matrix  $\Sigma$  measures the shared evolutionary history between any two species  $s_i$  and  $s_j$  on  $T_{\mathcal{R}}$  (in our example  $\Sigma_{12} > \Sigma_{13} > \dots > \Sigma_{15}$ ). In turn, the number of traits  $\ell$  and  $\Sigma$  determine the interactions between species, stored in the matrix  $A$ .

132 communities. In particular, our results can be used to infer properties of the assembly graph  
 133  $\mathcal{G}$  associated with each regional pool [12].

## 134 Results

135 **Deterministic Limit.** First, consider the case where the number of traits,  $\ell$ , is very large  
 136 relative to the number of species,  $n$ . Let  $\gamma = \frac{\ell}{n}$  be their ratio. In the limit  $\gamma \rightarrow \infty$  we find  
 137 that  $A \rightarrow \Sigma$  (i.e., the sample covariance matrix converges to the population covariance ma-  
 138 trix). Thus, the properties of the community are determined solely by  $\Sigma$ . The simplest case  
 139 to study is if  $\Sigma = I_n$  (the identity matrix), which represents the covariance matrix induced  
 140 by the degenerate  $n$ -star tree with 0 shared branch length among all species (see Figure 2).  
 141 This covariance structure corresponds to an evolutionary scenario where all species diverge

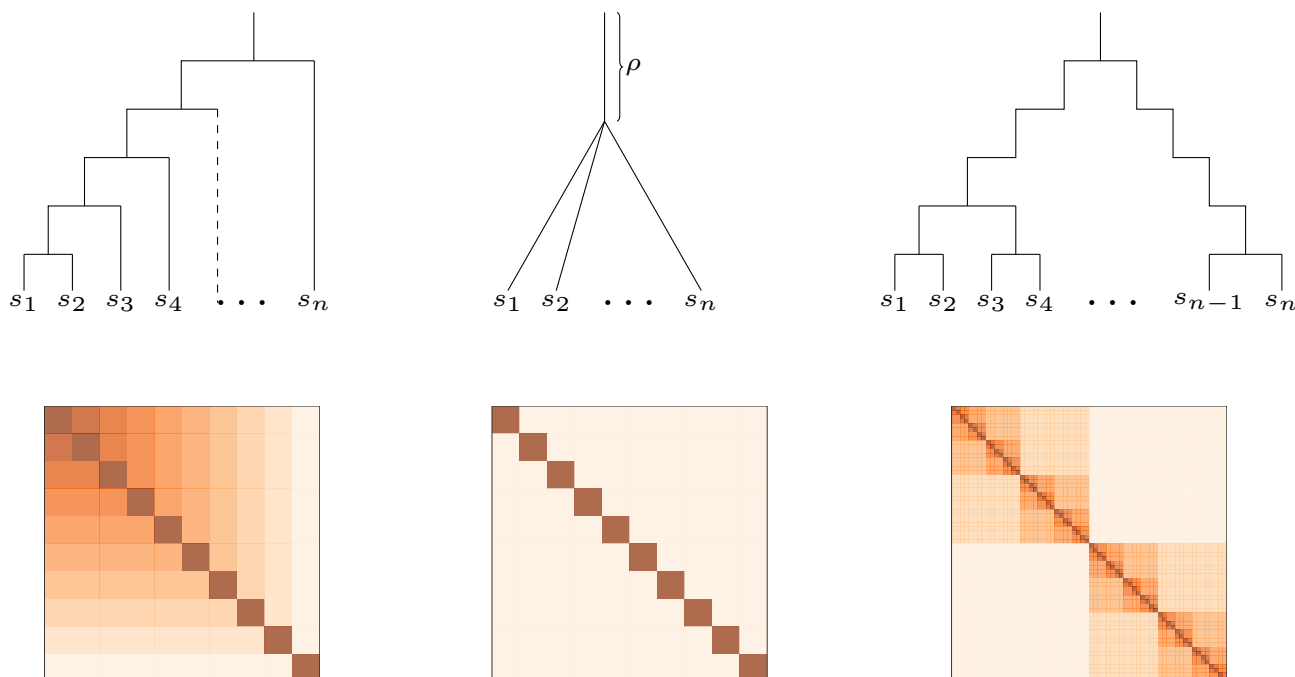

**Figure 2: Examples of ultrametric rooted phylogenies and its induced covariance matrices.** The perfectly unbalanced tree (left) has  $n - 1$  branching times  $0 < t_1 < \dots < t_{n-1}$  for a pool of  $n$  species, where each new branching happens to the “left” and creates a new pair of species. We call the times between branching events,  $t_i - t_{i-1}$ , *inter-branching times*. The star tree (middle) displays a unique branching event which generates all the  $n$  species. For the perfectly balanced tree (right) we have  $n$  branching *times* at each of which all the tips present up to that point generate two new species. Proceeding recursively,  $n$  branching times generate  $2^n$  species and we have  $n + 1$  distinct inter-branching times. The covariance matrix associated with each tree is constructed as follows: For any  $s_i$  take  $\gamma_i$  to be the path “backwards” in time to the ancestral species at the root of the tree, then for any two  $s_i, s_j$ , let  $t(i, j)$  be the time at which  $\gamma_i$  and  $\gamma_j$  merge, i.e., the coalescence time between  $s_i$  and  $s_j$  [36]. Then,  $\Sigma_{ij} = 1 - t(i, j)$ . In particular,  $\Sigma_{ij}$  is the total time for which the evolutionary processes for  $s_i$  and  $s_j$  are completely linked. For example, in the star tree  $\Sigma_{ij} = \rho$  for any  $i \neq j$  and  $\Sigma_{ii} = 1$ , given that each tree is ultrametric.

142 immediately at time 0. In this case, complete coexistence of  $\mathcal{R}$  and any of its sub-communities  
143  $S \subseteq \mathcal{R}$  follows trivially, since species do not interact with each other. Remarkably, the same  
144 behavior (full coexistence) is shared by any  $\Sigma$  induced by a tree  $T$ . This can be proved induc-  
145 tively using the following observation: If  $t_1$  is the time at which the first split happens in the  
146 phylogenetic tree, then “cutting” the tree at this branching point generates non-interacting  
147 sub-trees  $T_i$ , which we assume to have fully coexisting equilibria under the induction hypoth-  
148 esis. Pasting these sub-trees together at their roots gives us a degenerate tree for which the  
149 induced covariance matrix is a block diagonal matrix  $\tilde{\Sigma}$ . This operation preserves coexistence,  
150 since the sub-trees are still non-interacting. We recover  $T$  by attaching a branch length  $t_1$  to  
151 the root. In terms of the variance-covariance matrix,  $\Sigma$  is obtained by adding a constant to  $\tilde{\Sigma}$ .  
152 Assuming equal growth rates, this transformation does not affect the feasibility of the system;  
153 hence  $\Sigma$  has a feasible equilibrium (see fig S1 and supplementary information S2 for a more  
154 detailed argument). Thus, for  $\gamma \gg 1$  (i.e., if  $A \approx \Sigma$ ), we have full coexistence regardless of the  
155 tree topology. Moreover, the assembly graph  $\mathcal{G}$  for the species pool  $\mathcal{R}$  contains all possible  
156 assembly histories (c.f. [32] and [42]); in other words, any sub-community can be built by  
157 starting with a single species and adding the remaining members sequentially in any order.

158 **Total biomass and abundance distribution.** Under our model, phylogeny strongly  
159 influences the biomass and relative abundance distribution of a community. As illustrative  
160 examples, consider the two extreme tree topologies given by the “perfectly unbalanced” tree  
161 and the “perfectly balanced” tree (Figure 2). Assuming equal inter-branching times, the total  
162 biomass of the system,  $W(n)$ , for a pool of  $n$  species is given by  $W(n) \approx \sqrt{n} - 1/4$  in the  
163 perfectly unbalanced case, and  $W(n) = \frac{\log_2(n)+1}{2-1/n}$  in the perfectly balanced case (see section  
164 S2 for details). Similarly, we are able to derive expressions for the individual biomass of  
165 each species  $s_i$ , where the index corresponds to the position in the ordered tips of the tree  
166 (see Figure 2). For the perfectly balanced case, the abundance distribution is trivial, since  
167 each species necessarily has the same abundance. On the other hand, the hierarchical nature  
168 of the perfectly unbalanced tree is reflected in the individual biomasses, with species that  
169 split from the rest early on having much higher abundances. Fig 3 and S2 show that the  
170 results are qualitatively unchanged if we sample the inter-branching times from appropriately  
171 normalized exponential or uniform distributions. The uneven distribution of abundances for  
172 the unbalanced tree helps explain the difference in total biomass: in the perfectly unbalanced



173 case, as  $n$  grows there is a fraction of species (outliers) that interact less and less strongly  
174 with the rest of the community, so that their abundance approaches the limit 1 (obtained  
175 for non-interacting species). In contrast, in the perfectly balanced case the abundance of all  
176 species is the same, and approximately  $\frac{\log_2(n)}{n}$ .

177 To compare these results with predicted abundances using a more complicated tree struc-  
178 ture, we repeated the calculation using the phylogenetic tree of the *Senna* clade (Fabales) [39].  
179 We considered two cases: either we include the branch length information, or we set all branch  
180 lengths to be equal, so that only the effects due to the shape of the tree are considered. The  
181 average total biomass  $W(n)$  for sub-communities of different sizes (Figure 3) shows that for  
182 both cases at small enough sizes,  $W(n)$  behaves as predicted by the perfectly unbalanced  
183 model—which reflects the hierarchical low-level structure of the tree (Figure 6). But as  
184 the size of the sub-community increases,  $W(n)$  either reaches values even smaller than the  
185 perfectly unbalanced tree, or settles in the middle of the two—showing that, under equal  
186 inter-branching times, the perfectly balanced and perfectly unbalanced tree represent the two  
187 extreme topologies. The species’ abundance distribution, as for the perfectly unbalanced tree,  
188 reflects the tree structure: the abundance profile shows peaks at each of the outliers within  
189 clades, and an overall decreasing trend toward more deeply nested parts of the tree (see also  
190 Figure 6).

191 **Star phylogenies.** Classical results in theoretical ecology have extended the principle  
192 of competitive exclusion to the case of multiple resources/regulating factors, showing that  
193 a necessary condition to observe a non-degenerate coexisting community of  $n$  species in our  
194 model is  $\ell \geq n$  [24, 41]. We have shown above that, for a fixed size of the pool,  $n$ , coexistence  
195 is guaranteed in the  $\ell \rightarrow \infty$ . To characterize the cases in between  $\ell = n$  and  $\ell \rightarrow \infty$ , we  
196 exploit the fact that  $A$  follows the Wishart distribution; as such we can make use of tools  
197 developed in statistics and economics to explore how the limit of full coexistence is approached  
198 (see section S3). To start, let  $\Sigma$  be induced by a star-tree with shared root of length  $\rho$  (see  
199 Figure 1). In this setting, there is a constant correlation  $\rho$  among the species in the pool. We  
200 find that for  $\gamma \approx 1$ , full coexistence is never achieved for large enough communities (Fig S3).  
201 Nevertheless, the community does not collapse completely, and a non-vanishing fraction of  
202 species is observed to coexist (Figure 4). The effect of increasing correlation among species  
203 is, as expected, to reduce the proportion of coexisting species,  $\wp$ . In particular, to observe at

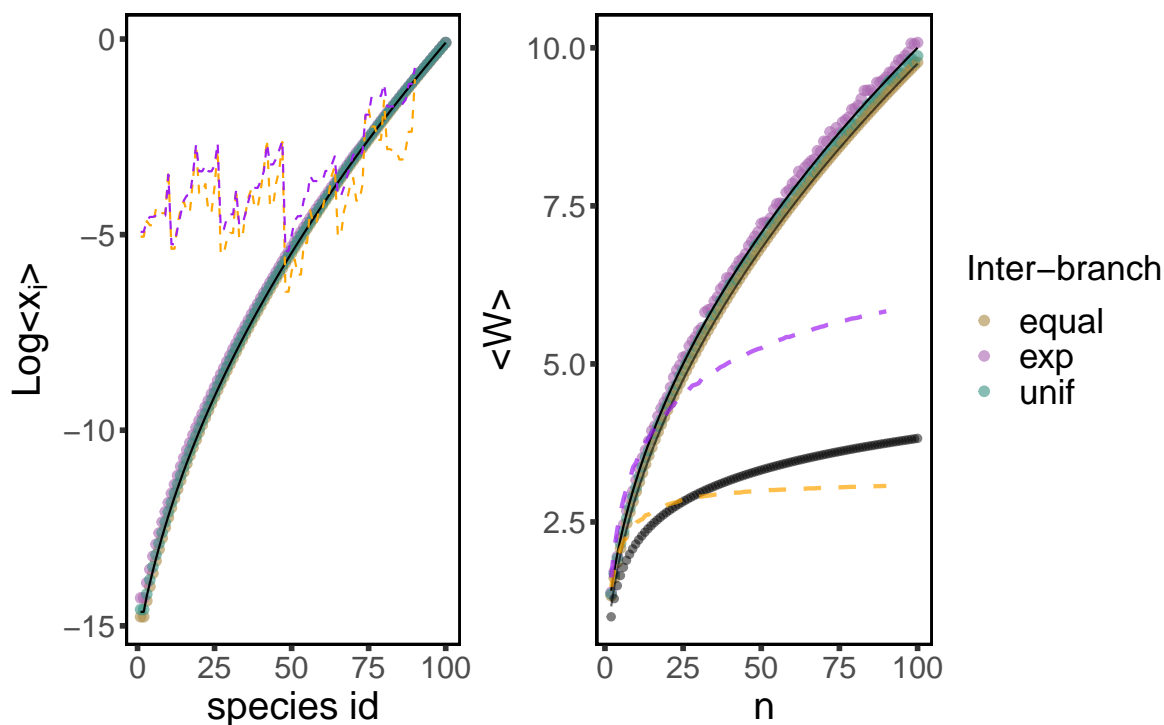

Figure 3: **Individual and total abundance for the deterministic limit.** Log individual abundance (left) and total abundance (right) for the communities in the deterministic limit of a perfectly unbalanced tree. Dots mark the average values when sampling the branch lengths from an exponential distribution with rate 1, a uniform  $[0, 1]$  distribution, and the case of equal branch lengths. The total branch length is renormalized to 1 in all cases. Solid lines are the analytic predictions under equal branch length  $1/n$ . In the right panel, the two solid lines are given by  $\sqrt{n}$  and  $\sqrt{n} - 1/4$ , the black dots represent the analytic formula for a perfectly balanced tree which shows logarithmic growth  $\sim \frac{\log_2(n)+1}{2}$ . The dashed lines on the right panel are the scaling with size of sub-trees of the *Senna* phylogenetic tree, and the dashed lines on the left plot are the abundance distribution for the full tree (compare with Figure 6). In both cases the purple line is for the case of equal inter-branching times and the orange includes the branch length information.

204 least half of the species to coexist (in expectation), we need:

$$2\gamma \geq 1 + \frac{n\rho}{\pi(1-\rho)} \quad (4)$$

205 The quantity  $\zeta = \frac{\rho}{1-\rho}$  could be interpreted in the framework of population genetics as the  
 206 ratio of shared to private mutations for each species. It is a key quantity, in the sense that  
 207 two distinct pools  $\mathcal{R}$  and  $\mathcal{R}'$ , of sizes  $n$  and  $n'$  will yield the same mean fraction of coexisting  
 208 species, for a given  $\gamma$ , whenever  $n\zeta = n'\zeta'$ .

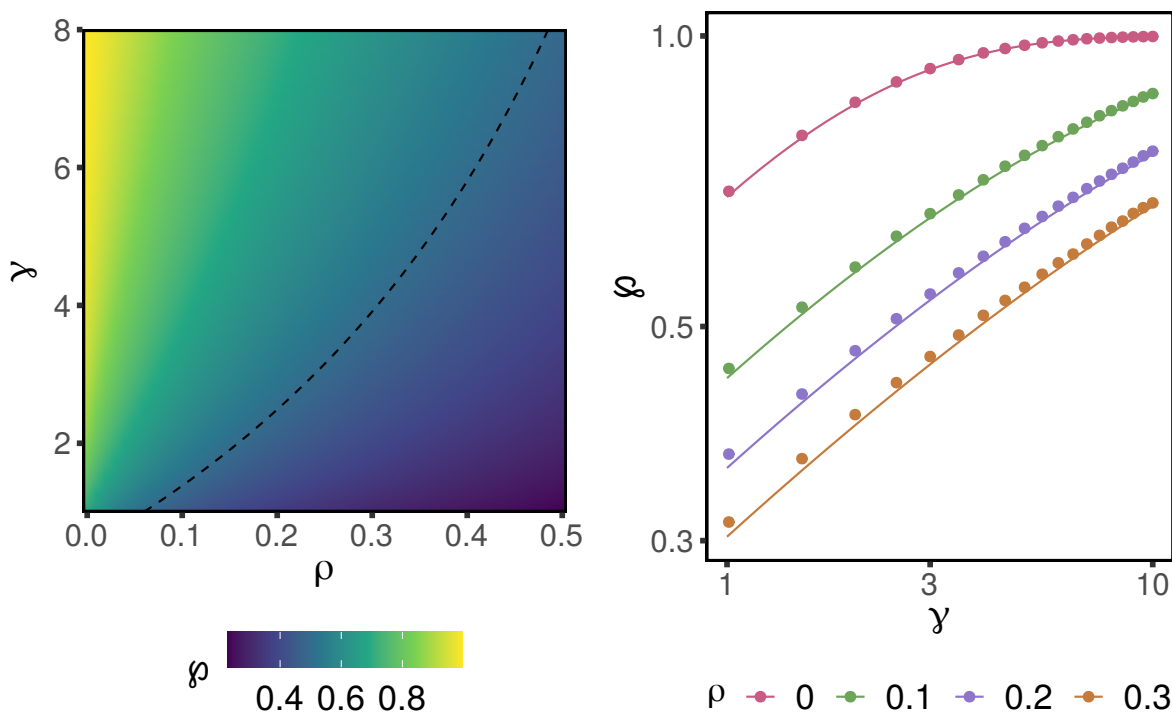

Figure 4: **Proportion of coexisting species  $\phi$  as a function of  $\rho$  and  $\gamma$ .** In the right panel, we compare our analytical approximations (solid lines) with simulations (dots) for a regional pool of 50 species (log-log scale). The left panel explores in more detail the parameter space  $(\gamma, \rho)$ . The dashed line marks parameters for which we expect half of the species to coexist. As suggested by eq. (4), the value of  $\gamma$  giving a fixed  $\phi$  increases sharply with  $\rho$ .

209 The distribution of total biomass,  $W$ , for the community of coexisting species is influenced  
 210 by  $\gamma$  and  $\rho$  in two different ways: the parameters affect both the distribution of the number of  
 211 coexisting species, and the conditional distribution of  $W$  for a given community size. Assuming  
 212 that the distribution of the number of coexisting species is highly peaked at the mode, we

213 derive an approximation for the mean of  $W$  that closely matches results from simulations  
214 (see section S4 and figure S5 for exact results and full distribution). For small enough  $\gamma$  the  
215 variance of the interactions allows the possibility of positive interactions that enhance  $W$ , as  
216  $\gamma$  increases the interaction matrix converge to the purely competitive interaction matrix given  
217 by  $\Sigma$ . This convergence explains the decrease of  $W$  with  $\gamma$  depicted in Figure 5.

218 Using the same strategy, we are able to derive approximations (see section S5 for exact  
219 formula) for the survival function of the relative abundance distribution under distinct values  
220 of  $\rho$  and  $\gamma$ . In particular, the distribution becomes very peaked as  $\gamma$  increases, while increasing  
221  $\rho$  tends to make the distribution flatter (Figure 5).

222 **Beyond constant correlation.** Imposing a more general covariance structure  $\Sigma$  is  
223 challenging from a mathematical standpoint, due to the breaking of the statistical equivalence  
224 among species—species in distinct parts of the tree have now different statistical properties.  
225 In the general case, the identities of the species matter, and instead of looking at the total  
226 number of coexisting species, we focus on how the probability that a particular species survives  
227 ( $p_s$ ) changes with its position in the tree. Simulations for the phylogenetic tree of the *Senna*  
228 clade show that the model recreates the phenomenon of phylogenetic over-dispersion: for a  
229 group of closely related species,  $p_s$  peaks at the outliers of the clade. Furthermore  $p_s$  reflects  
230 the tree structure in the same manner as the total abundance distribution (compare Figures 1  
231 and 6).

232 To further explore this relationship, we are able to analytically compute the probability of  
233 observing each sub-community in a three-species community (Figure 7). For  $n = 3$ , there is  
234 only one possible tree topology, and we consider the case where all branch lengths are equal.  
235 We find that sub-communities containing the outlier species,  $s_3$ , are always more likely to be  
236 observed than sub-communities of the same size in which  $s_3$  is absent. More generally, the  
237 formulas in section S3 can be evaluated numerically to find the probability of observing a  
238 particular sub-community under an arbitrary, not necessarily ultrametric, tree structure.

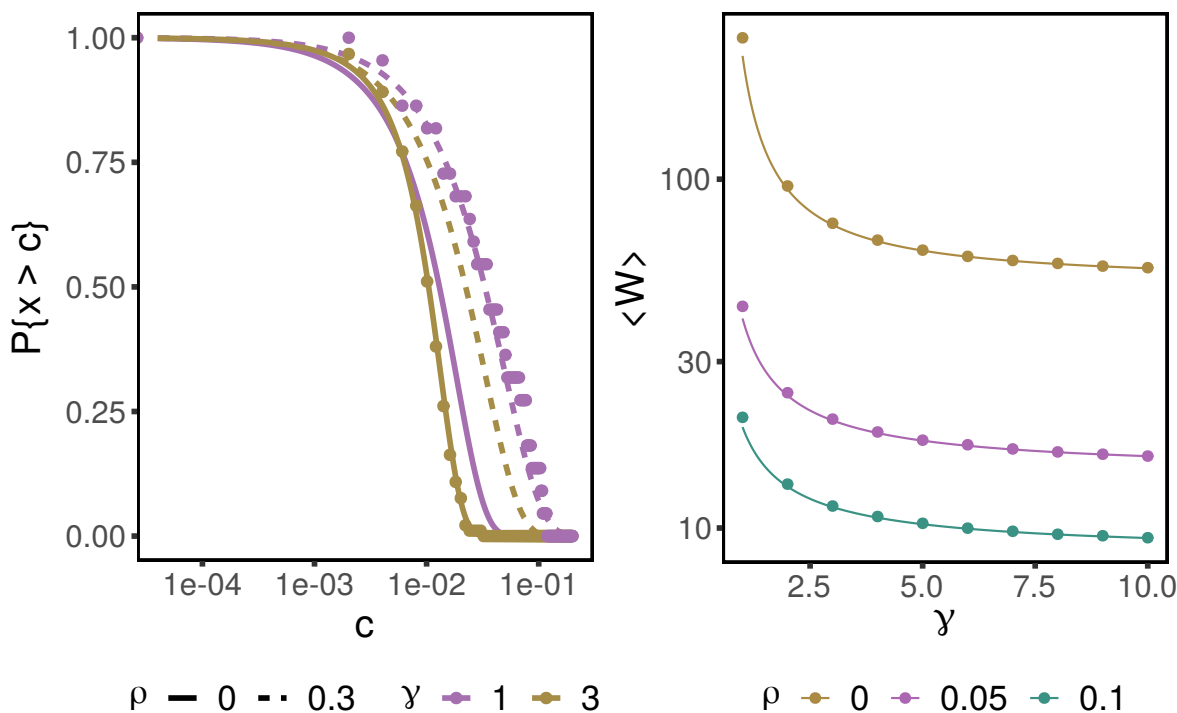

**Figure 5: Mean total biomass and relative abundance distribution.** The panel on the right shows (note the log-transformation for the y-axis) the mean total biomass for the community of coexisting species; the points represent simulations, and solid lines the corresponding analytical approximations for a pool of 50 species (see section S6 for the effect of changing  $\mu$ ). The total biomass decreases as  $\gamma$  grows, because the overall strength of interaction between species decreases. The survival function for the relative abundance values of the community is plotted on the left panel (note the log x-axis), where again points stand for simulations and lines for analytical predictions for distinct  $\gamma$  and  $\rho$  values, and a pool of 100 species. For clarity, we just show simulations for the parameters  $(\rho, \gamma) \in \{(0, 3), (0.3, 1)\}$ . In particular we have that as  $\gamma$  increases the distribution becomes more and more peaked (as expected) while increasing  $\rho$  flattens the distribution.

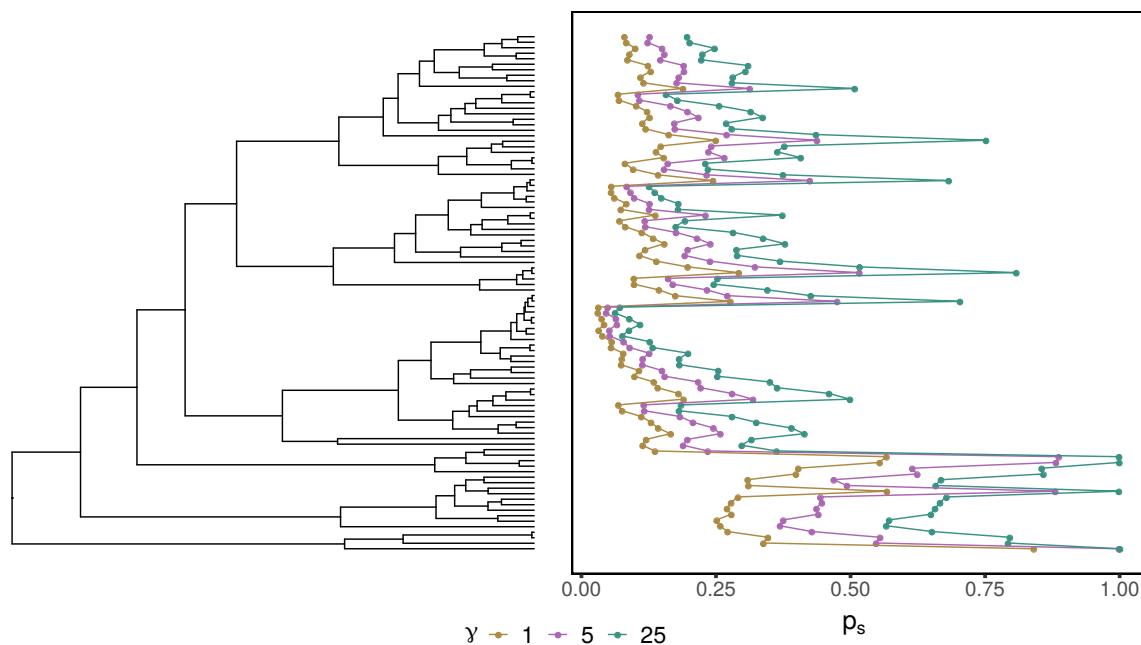

Figure 6: **Probability of individual species survival for an empirical tree.** The probability that a species is observed in the community of coexisting species,  $p_s$ , out of 5000 simulations, is shown alongside the phylogenetic tree (*Senna* clade) where the outermost group is used to set the root. The values  $p_s$  reflects the tree structure and the abundance distribution showed in Figure 1: The peaks in  $p_s$  correspond to outliers within a group of closely related species and  $p_s$  has a decreasing trend towards the most nested parts of the tree (upward direction). In particular, the model produces phylogenetic over-dispersion.

## 239 Discussion

240 By considering local community dynamics in a trait-based interaction model, our results  
241 provide a clear link between the phylogeny of the regional species pool and many aspects of  
242 species coexistence. Importantly, while the tree structure is reflected in the local community  
243 patterns, the number of traits controlling interspecific interactions modulates the outcomes.

244 We found that, when phylogenetic relatedness completely controls interactions, i.e., when  
245 the number of traits is sufficiently high compared to the number of species, full coexistence of  
246 any sub-community is guaranteed. This result requires both the tree structure (which induces  
247 a particular interaction matrix) and the assumption that all species have equal growth rates.

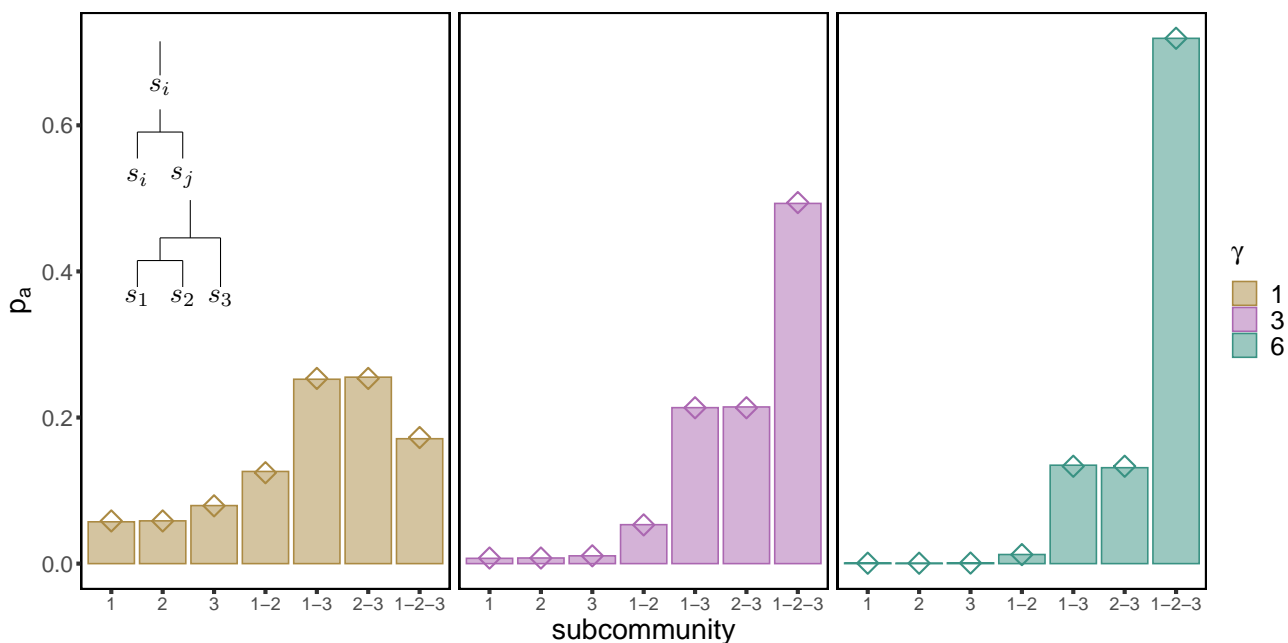

Figure 7: **Sub-communities of perfectly unbalanced tree** Probability of observing a given sub-community of the three-species tree with equal branch lengths. The inset shows the tree sub-structures for each of the sub-communities. Bars represent frequencies over 50000 simulations, and dots the analytical predictions.

248 While we expect this result to hold qualitatively for small deviations from the assumption of  
 249 identical growth rates (see section S7), it is false in general when these requirements are not  
 250 satisfied. Under the same assumptions, the abundance distribution of the community reflects  
 251 the tree structure at distinct levels: high biomass is observed for the outliers within each clade  
 252 (local tree structure), and one expects an overall decreasing trend towards more nested parts  
 253 of the tree (coarser structure).

254 When the number of traits is comparable to the number of species, our model is an instance  
 255 of a Lotka-Volterra model with random interactions. The analysis of models considering  
 256 random interactions between species has a long tradition in ecology [1, 17, 27], and in recent  
 257 years the field has moved beyond questions concerning the stability and feasibility of the whole  
 258 system, focusing more closely on the properties of sub-communities that coexist through the  
 259 dynamics [3, 6, 10, 33]. In these models, one must usually assume that species interactions are  
 260 independent of species identity (but see [2, 16]). The star-tree case studied above satisfies this  
 261 assumption, but with a stronger correlation structure than has been previously considered.

262 This case behaves much like other random interaction models: full coexistence of many species  
263 is extremely unlikely, but we expect a moderate number of species to coexist. We have derived  
264 an approximation for the mean number of coexisting species, which depends on the ratio of  
265 traits to species,  $\gamma$ , and on the expected ratio of shared to private mutations for each species  
266  $n\zeta$ . As long as these two quantities are the same, pools of distinct sizes will yield the same  
267 distribution for the number of coexisting species. Contrary to previous studies [33], the  
268 analytic tractability of the model allows us to derive exact expressions for the total biomass  
269 and relative abundance distribution of the system.

270 The general case of an arbitrary, tree-induced correlation structure provides a biologically-  
271 meaningful way to relax the statistical equivalence between species. Taking advantage of the  
272 vast literature on the Wishart ensemble in fields ranging from economics to statistics [8, 22, 30],  
273 we are able to derive exact integral formulas to compute the probability of survival for any  
274 sub-community under arbitrary tree structure. In this way, one can measure properties of  
275 the system (conditioning on a final sub-community) by numerically evaluating the integral  
276 expression. For small enough communities and simple enough phylogenies, this approach can  
277 be replicated on each sub-system to compute the marginal distribution of the properties of  
278 interest. However, as the number of species grows, these calculations become burdensome. As  
279 such, devising new analytical techniques to tackle the general case would be an important step  
280 toward studying more general random interaction models, and also advance our understanding  
281 of the effects of phylogenies on communities.

282 Our approach can be extended in a variety of ways, and we briefly discuss some of the  
283 most promising avenues.

284 First, instead of assuming that the same tree structure controls the evolution of all  $\ell$   
285 traits, we can partition the traits into  $m$  classes and assume that the evolution of each class is  
286 determined by a distinct phylogenetic tree. These type of processes are studied in population  
287 genetics when either admixture or incomplete lineage sorting lead to traits that cannot be  
288 explained by a single tree [31]. In such cases,  $A$  would no longer follow the Wishart distribution  
289 but would rather be a sum of (possibly degenerate) Wishart matrices.

290 Second, our assumption of equal growth rates among species allowed us to examine how  
291 phylogenetic relatedness influences coexistence in a purely interaction-driven model. When  
292 we include variation in growth rates, we expect our results to hold only for sufficiently small



293 variance. In this case, the restriction on  $l \geq n$  can be lifted, provided that there is a back-  
294 ground competitive effect  $\mu$  strong enough to prevent divergence of the dynamics (see section  
295 S7). It would be interesting to consider models where growth rates vary under the influence  
296 of phylogeny; by modulating how strongly evolutionary relatedness affects both growth rates  
297 and interactions, one could investigate the duality between “competition” and “filtering” that  
298 is frequently discussed in the literature [14, 28, 38].

299 Lastly, our approach assumes an explicit separation between evolutionary processes at  
300 the regional level (which give rise to the phylogenetic structure) and ecological interactions  
301 (at the local level). To remove this separation, one could model the tree generation process  
302 and ecological dynamics concurrently. For example, as done by Maynard et al. [29], one  
303 could “run” the dynamics after each new speciation event, thereby pruning the community  
304 to a coexisting sub-community. One would then take the sub-tree of that community as the  
305 starting point for the new speciation event. In this setting, in a similar manner to studies of  
306 community assembly [32] and the framework of adaptive dynamics [21], we have a separation of  
307 time-scales between the speciation events and the local community dynamics. Traits evolve on  
308 the tree between each pruning event. In this regard, our results provide baseline comparisons,  
309 and even suggests patterns that would emerge from the process: assuming that the number  
310 of traits is a constant  $\ell$ , the community cannot reach more than  $\ell$  species, yet at the early  
311 steps of the process the ratio of traits to species could be extremely high—hence we expect  
312 that most speciation events occurring early on would not cause extinctions; in this case, the  
313 bulk of the phylogenetic structure would be built at the beginning of the process. Perturbing  
314 the growth rates slightly, one could compare the structure of this tree with the structure of  
315 the tree found by simply letting the tree generation process run, and after having the same  
316 number of speciation events let the species interact and get a coexisting sub-community.

317 While there has been extensive discussion of the potential ways in which phylogeny could  
318 affect ecological differences, and thus interactions, among species [11], much less has been said  
319 about the patterns one would observe under a particular hypothesis. In this work, by linking  
320 phylogenies to a simple model of trait evolution and local community dynamics, we were able  
321 to fully characterize many global aspects of the community. We showed that the phylogenetic  
322 structure of the species pool and the the number of traits determining competition affect the  
323 results in concert. Our results provide a useful baseline prediction for the effect of phylogeny

324 on community dynamics and coexistence.

325 **Acknowledgments.** We thank P. Lemos and M.O. Carlson for comments on the manuscript.  
 326 J.A.C. acknowledges financial support from the Spanish ‘Ministerio de Economía y Competitividad’ project PGC2018-096577-B-I00. Z.R.M. acknowledges support from the National  
 327 itividad’ project PGC2018-096577-B-I00. Z.R.M. acknowledges support from the National  
 328 Science Foundation Graduate Research Fellowship Program under Grant No.(DGE-1746045).

## 329 Supplementary information

### 330 1 Motivation

#### 331 From consumer-resource dynamics to covariances

332 We start with a model of consumer-resource dynamics in which the consumers differ only in  
 333 the relative preference of each resource and the resources have an homogenous growth rate.  
 334 Let  $\mathbf{x} \in \mathbb{R}^n$ ,  $\mathbf{y} \in \mathbb{R}^\ell$  be vectors denoting the density of predators and resources. We model  
 335 the dynamics as the MacArthur’s consumer-resource model [25]:

$$\begin{aligned} \frac{d\mathbf{x}}{dt} &= \mathbf{x} \circ (-d\mathbf{1}_n + \alpha\tilde{G}\mathbf{y}), \\ \frac{d\mathbf{y}}{dt} &= \mathbf{y} \circ (r\mathbf{1}_\ell - \mathbf{y} - \beta\tilde{G}^T\mathbf{x}), \end{aligned} \quad (5)$$

336 where  $\circ$  stands for the Hadamard (component-wise) matrix product, and  $\mathbf{1}_k = (1, \dots, 1)^T \in$   
 337  $\mathbb{R}^k$  is a notation for a column vector whose entries are exactly  $k$  ones.

338 By our assumptions, matrix  $\tilde{G} \in \mathbb{R}_+^{n \times \ell}$  encodes the preference distribution (alternatively,  
 339 the time allocation distribution) of the predators over the resources, so that  $\tilde{G}\mathbf{1}_\ell = \mathbf{1}_n$ . Then  
 340 by a separation of time scales, which implies that resource densities remain at equilibrium, we  
 341 can model the competition between the consumers as following competitive Lotka-Volterra  
 342 dynamics [25]:

$$\frac{d\mathbf{x}}{dt} = \mathbf{x} \circ (\alpha r \tilde{G} \mathbf{1}_\ell - d \mathbf{1}_n - \alpha \beta \tilde{G} \tilde{G}^T \mathbf{x}) = \mathbf{x} \circ ((\alpha r - d) \mathbf{1}_n - \alpha \beta \tilde{G} \tilde{G}^T \mathbf{x}). \quad (6)$$

343 As long as  $n \leq \ell$  (besides measure zero sets) we have that matrix  $\tilde{A} := \tilde{G} \tilde{G}^T$  is positive  
 344 definite. This property of  $\tilde{A}$  allows one to further transform the system (6) without affecting

345 the set of coexisting species. In particular we can perform the following operations (see  
 346 section 6 for a more detailed discussion):

347 (a) Rescale the growth rate,  $\mathbf{v} = (\alpha r - d)\mathbf{1}_n$ , by any positive constant.

348 (b) Multiply  $\tilde{A}$  by a positive, constant diagonal matrix.

349 (c) Multiply both  $\tilde{A}$  and  $\mathbf{v}$  by a positive diagonal matrix.

350 Following this operations we reduce the system to

$$\frac{d\mathbf{x}}{dt} = \mathbf{x} \circ (\mathbf{1}_n - \tilde{G}\tilde{G}^T \mathbf{x}). \quad (7)$$

351 To distinguish the effect of the mean of  $\tilde{G}$ , write  $\tilde{G} = G + \frac{1}{n}\mathbf{1}_n\mathbf{1}_\ell^T$ . Notice that this  
 352 decomposition, together with the restriction  $\tilde{G}\mathbf{1}_\ell = \mathbf{1}_n$ , implies that  $G\mathbf{1}_\ell = \mathbf{0}_n$ , which means  
 353 that the entries of  $G$  have zero mean —here  $\mathbf{0}_k = (0, \dots, 0)^T$  stands for a column vector  
 354 formed by  $k$  zeros. Then matrix  $\tilde{A}$  can be decomposed as  $\tilde{A} = GG^T + \mathbf{1}_n\mathbf{1}_n^T$ . Because the  
 355 system in (7) has constant growth rates then one can show (section 6) that, as long as  $\ell > n$   
 356 (the strict inequality arising due to  $G$  having rank  $\ell - 1$ ), the set of coexisting species for (7)  
 357 is invariant to the shift  $\mathbf{1}_n\mathbf{1}_n^T$ . Therefore the system reduces to:

$$\frac{d\mathbf{x}}{dt} = \mathbf{x} \circ (\mathbf{1}_n - GG^T \mathbf{x}) = \mathbf{x} \circ (\mathbf{1}_n - A\mathbf{x}), \quad (8)$$

358 where we have defined  $A := GG^T$ . This is the competitive, deterministic dynamics that we  
 359 have assumed for consumers throughout this contribution. Observe that the set of coexisting  
 360 species remains unchanged if we define interaction matrix  $A = \frac{1}{\ell}GG^T$ , as in the main text,  
 361 because of the aforementioned invariant operations.

## 362 Modelling the covariance matrix

363 From (8) we see that the interactions between species  $A_{ij}$  are fully determined by the row  
 364 vectors  $\mathbf{G}_i$ . Because each row  $\tilde{\mathbf{G}}_i$  of matrix  $\tilde{G}$  is a preference vector, then it lies on the  
 365 standard  $\ell - 1$  dimensional simplex  $\Delta^{\ell-1} = \{\tilde{\mathbf{G}}_i \in \mathbb{R}^\ell \mid \sum_{j=1}^\ell \tilde{G}_{ij} = 1, \text{ for } i = 1, \dots, n\}$ , which  
 366 implies that  $\mathbf{G}_i$  lies on a bounded subset of a linear subspace of  $\mathbb{R}^\ell$  defined by the restrictions  
 367  $\sum_{j=1}^\ell G_{ij} = 0$  for  $i = 1, \dots, n$ . By choosing a suitable (linear) coordinate system  $\{\mathbf{w}_j\}_{j=1}^\ell$  we

368 can express

$$\begin{aligned} \mathbf{G}_i &= \sum_{j=1}^{\ell} c_i^j \mathbf{w}_j, \\ A_{ij} &= \mathbf{G}_i \mathbf{G}_j^T = \sum_{k=1}^{\ell} c_i^k c_j^k. \end{aligned} \tag{9}$$

369 Therefore, the entries of  $A$  are fully determined by the coordinates of row vectors  $\mathbf{G}_i$  on the  
370 basis  $\{\mathbf{w}_j\}_{j=1}^{\ell}$ .

371 To model coordinates  $c_i^j$  we assume that each (rescaled) preference vector  $\mathbf{G}_i$  is the result  
372 of a diffusion process starting at the origin of this space (this maps back to our  $\tilde{\mathbf{G}}$  matrix as  
373 saying that every consumer has an *homogeneous* preference for any resource). Assuming that  
374 each coordinate is independent and letting the diffusion time be small enough, then coeffi-  
375 cients  $c_i^j$  are normally distributed,  $c_i^j \sim \mathcal{N}(0, \sigma)$ . The invariant properties of the model allow  
376 us to forget about the deviation  $\sigma$  and simply model  $c_i^j \sim \mathcal{N}(0, 1)$ . This shows that  $A$  satisfies  
377 the assumptions of model (8) up to a change of number of traits from  $\ell$  to  $\ell - 1$ .

378

## 379 **2 Deterministic limit**

### 380 **Full coexistence**

381 We provide more details for the proof that, in the deterministic limit, every subcommunity of  
382 the pool is feasible. Since every subcommunity has an interaction matrix induced by a tree,  
383 it is enough to show that feasibility is guaranteed whenever this is the case.

384 We proceed by induction on the number of species. For  $n = 1$  the claim holds trivially.  
385 Let  $T$  be a phylogenetic tree (not necessarily ultrametric) for  $n$  species, and  $\Sigma$  its respective  
386 covariance matrix. Let  $t_1$  be the time at which the first split happens, so that at  $t_1$  the  
387 ancestral branch splits into  $m \geq 2$  lineages ( $L_i$ , with  $i = 1, \dots, m$ ) where each  $L_i$  contains at  
388 most  $n - 1$  species. Lineages are defined by the condition that species  $j, k \in L_i$  if and only  
389 if the shared branch length between both species  $t(j, k)$  satisfies  $t(j, k) > t_1$ . That is, each  
390 lineage contains the subset of species whose shared evolutionary time is strictly greater than  
391  $t_1$ . For each  $L_i$ , take  $T_i$  to be the subtree induced by  $L_i$ . Consider  $\tilde{T}$ , the tree obtained by  
392 shrinking the segment between the root and  $t_1$  to a point (see Fig. 8), then  $\tilde{T}$  is a phylogenetic

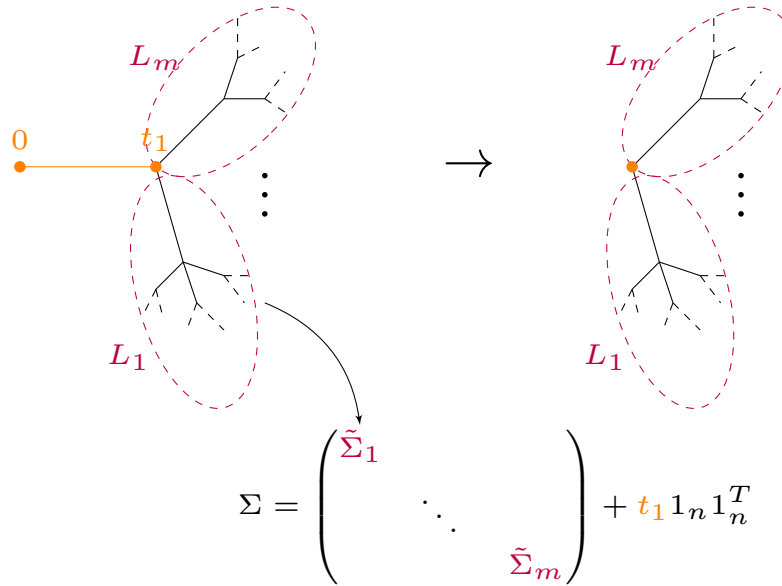

Figure 8: **Schematic representation of the inductive step on the proof of full coexistence.** Starting with the tree  $T$  (left), we shrink the ancestral branch up to the first splitting time  $t_1$  to have a degenerate tree  $\tilde{T}$  (on the right).  $\tilde{T}$  splits at time 0 into  $m$  distinct subtrees induced by the lineages  $L_i$  for  $i = 1, \dots, m$ . The covariance matrix for  $T$ ,  $\Sigma$ , is obtained from the covariance matrix  $\tilde{\Sigma}$  of  $\tilde{T}$  by “adding back” the ancestral branch. This amounts to a constant rank-one update of  $\tilde{\Sigma}$  which preserves feasibility.

393 tree, for which the covariance matrix  $\tilde{\Sigma}$  is block diagonal and given by diagonal blocks  $\tilde{\Sigma}_i$ .  
 394 Each  $\tilde{\Sigma}_i$  is the covariance matrix of the tree  $\tilde{T}_i$  which is obtained from  $T_i$  by shrinking the root  
 395 branch by  $t_1$ . By induction it follows that each block  $\tilde{\Sigma}_i$  is feasible, hence  $\tilde{\Sigma}$  is also feasible.  
 396 Observe that, going backwards,  $T$  is obtained from  $\tilde{T}$  by adding a root segment of length  
 397  $t_1$ . In particular this says that the shared evolutionary times of all species increases by  $t_1$ ,  
 398 i.e.  $\Sigma = \tilde{\Sigma} + t_1 \mathbf{1}_n \mathbf{1}_n^T$ , so that  $\Sigma$  is a constant rank-one update of  $\tilde{\Sigma}$ . Then by section 6, the  
 399 equilibrium associated to  $\Sigma$  is feasible.

#### 400 Perfectly hierarchical trees

401 Consider a perfectly hierarchical tree  $T_n$  with  $n$  tips and branching times  $t_0 = 0 < t_1 < \dots <$   
 402  $t_n < 1$  (see figures 1-2 of the main text), and let  $\Sigma_n$  be its covariance matrix. Then it follows  
 403 trivially that

$$\Sigma_n = \begin{pmatrix} \tilde{\Sigma}_{n-1} & \mathbf{0}_{n-1} \\ \mathbf{0}_{n-1}^T & s_1 \end{pmatrix} + t_1 \mathbf{1}_n \mathbf{1}_n^T, \quad (10)$$

404 where  $s_i := \sum_{j=i+1}^n \Delta t_j$ , for  $\Delta t_j = t_j - t_{j-1}$  the time between two branching events— the  
 405 *inter-branching time*. In this subsections we find accurate bounds for the total biomass and  
 406 analyze the expected abundance distribution.

407 Define the vector of abundances  $\mathbf{x}_n = (x_n^i)$  for a hierarchical tree  $T_n$  with  $n$  tips. In the  
 408 deterministic limit, this vector satisfies the linear system

$$\Sigma_n \mathbf{x}_n = \mathbf{1}_n. \quad (11)$$

409 As in the proof of feasibility,  $\mathbf{x}_n$  is given recursively by the updated equilibrium abundances  
 410  $\tilde{\mathbf{x}}_{n-1}$  and  $s_1^{-1}$  of the non-interacting subtrees  $\tilde{T}_{n-1}$  and the one formed by the first species,  
 411 respectively. Indeed, if we look for solutions of the form  $\mathbf{x}_n = \begin{pmatrix} a\tilde{\mathbf{x}}_{n-1} \\ x_n^n \end{pmatrix}$ , where the vector of  
 412 abundances  $\tilde{\mathbf{x}}_{n-1}$  satisfies  $\tilde{\Sigma}_{n-1}\tilde{\mathbf{x}}_{n-1} = \mathbf{1}_{n-1}$ ,  $\tilde{\Sigma}_{n-1}$  being the covariance matrix of the subtree  
 413  $\tilde{T}_{n-1}$ , the equilibrium condition (11) for  $\mathbf{x}_n$  reduces to a linear system for  $a$  and  $x_n^n$ :

$$\begin{cases} a + at_1 \mathbf{1}_{n-1}^T \tilde{\mathbf{x}}_{n-1} + t_1 x_n^n = 1, \\ at_1 \mathbf{1}_{n-1}^T \tilde{\mathbf{x}}_{n-1} + (s_1 + t_1)x_n^n = 1. \end{cases} \quad (12)$$

414 The solution is  $a = s_1 x_n^n$ , with  $x_n^n = (s_1 + t_1 + s_1 t_1 \mathbf{1}_{n-1}^T \tilde{\mathbf{x}}_{n-1})^{-1}$ . Let  $\tilde{W}_{n-1} := \sum_{i=1}^{n-1} \tilde{x}_{n-1}^i =$   
 415  $\mathbf{1}_{n-1}^T \tilde{\mathbf{x}}_{n-1}$ . Then  $\mathbf{x}_n$  can be written in terms of  $\tilde{W}_{n-1}$ ,  $\tilde{\mathbf{x}}_{n-1}$ ,  $s_0 = s_1 + t_1$ , and  $s_1$  as

$$\begin{aligned} x_n^n &= \frac{1}{s_0 + t_1 \tilde{W}_{n-1} s_1}, \\ x_n^i &= \frac{s_1 \tilde{x}_{n-1}^i}{s_0 + t_1 \tilde{W}_{n-1} s_1}, \quad 1 \leq i < n. \end{aligned} \quad (13)$$

416 In particular, this implies the following recurrence for the total biomass,  $W_n$ :

$$W_n = \frac{1 + \tilde{W}_{n-1} s_1}{s_0 + t_1 \tilde{W}_{n-1} s_1}. \quad (14)$$

417 In the case of equal inter-branching times,  $\Delta t_i = \frac{1}{n}$  for all  $i = 1, 2, \dots, n$ , observe that  
 418  $s_0 = 1$ ,  $s_1 = \frac{n-1}{n}$  and  $\tilde{\Sigma}_{n-1} = \frac{n-1}{n} \Sigma_{n-1}$ . Hence  $\mathbf{x}_{n-1} = s_1 \tilde{\mathbf{x}}_{n-1}$  and  $W_{n-1} = s_1 \tilde{W}_{n-1}$ , so

419 Eqs. (13) and (14) above reduce to:

$$\begin{aligned} x_n^n &= \frac{n}{n + W_{n-1}}, \\ x_n^i &= \frac{nx_{n-1}^i}{n + W_{n-1}}, \quad 1 \leq i < n, \\ W_n &= \frac{n(1 + W_{n-1})}{n + W_{n-1}}. \end{aligned} \tag{15}$$

420 The following proposition provides accurate upper and lower bounds for total biomass in the  
421 limit of large number of species.

422 **Proposition 1.** *Let*

$$\varphi(n) := \frac{4n - 1 - \sqrt{16n^2 + 1 - 8n\sqrt{n-1}}}{4\sqrt{n-1}}. \tag{16}$$

423 *Then, for equal branching times, it holds that  $\sqrt{n} - \varphi(n) > W_n > \sqrt{n} - 1/4$  for  $n \geq 2$  and  
424  $\varphi(n) \rightarrow 1/4$  in the limit  $n \rightarrow \infty$ .*

425 *Proof.* Direct computation shows that the inequality holds at  $n = 2$  so we proceed by induction  
426 on  $n$ .

427 Consider first the lower bound. Suppose it holds at  $n - 1$ , then:

$$W_n = \frac{n(1 + W_{n-1})}{n + W_{n-1}} = n \left( 1 - \frac{n-1}{n + W_{n-1}} \right) > \frac{n(\sqrt{n-1} + 3/4)}{n + \sqrt{n-1} - 1/4}.$$

428 If the claim were not satisfied at  $n$  we would have

$$\sqrt{n} - 1/4 \geq \frac{n(\sqrt{n-1} + 3/4)}{n + \sqrt{n-1} - 1/4}.$$

429 Rearranging terms, this gives the following chain of equivalent inequalities:

$$\begin{aligned} n\sqrt{n} + \sqrt{n-1}\sqrt{n} + \frac{1}{16} &\geq n\sqrt{n-1} + n + \frac{1}{4}(\sqrt{n-1} + \sqrt{n}), \\ n(\sqrt{n} - 1) + \sqrt{n-1}\sqrt{n}(1 - \sqrt{n}) + \frac{1}{16} &\geq \frac{1}{4}(\sqrt{n-1} + \sqrt{n}), \\ \sqrt{n}(\sqrt{n} - 1)(\sqrt{n} - \sqrt{n-1}) + \frac{1}{16} &\geq \frac{1}{4}(\sqrt{n-1} + \sqrt{n}). \end{aligned} \tag{17}$$

430 Multiplying both sides by  $\sqrt{n-1} + \sqrt{n}$  we get

$$\sqrt{n}(\sqrt{n}-1) + \frac{1}{16}(\sqrt{n-1} + \sqrt{n}) \geq \frac{1}{4}(\sqrt{n-1} + \sqrt{n})^2 = \frac{1}{4}(2n-1 + 2\sqrt{n-1}\sqrt{n}). \quad (18)$$

431 The last inequality implies

$$\frac{3}{4} \geq \frac{7}{8}\sqrt{n},$$

432 which says  $n \leq 1$ . This is a contradiction and we are done.

433 We proceed in the similar way for the upper bound. By induction hypothesis at  $n-1$  we  
434 have

$$W_n < \frac{n(\sqrt{n-1} + 1 - \varphi(n))}{n + \sqrt{n-1} - \varphi(n)}.$$

435 If the inequality is not satisfied at  $n$  then, a similar chain of inequalities yields

$$n - \sqrt{n} + \varphi(n)^2(\sqrt{n} + \sqrt{n-1}) \leq \varphi(n)(2n-1 + 2\sqrt{n-1}\sqrt{n}). \quad (19)$$

436 Note that the above restriction is exactly the same as (18) with the inequality reversed and  
437 changing  $\varphi(n)$  instead of  $1/4$ . Using that  $\sqrt{n} > \sqrt{n-1}$ , the last inequality implies

$$n - \sqrt{n} + 2\sqrt{n-1}\varphi(n)^2 - (4n-1)\varphi(n) \leq 0.$$

In particular, this means that  $\varphi(n) \leq u$  for  $u$  the smaller root of the above quadratic equation,

$$u := \frac{4n-1 - \sqrt{16n^2 - 8n + 1 - 8n\sqrt{n-1} + 8\sqrt{n-1}\sqrt{n}}}{4\sqrt{n-1}},$$

but with this definition and (16) it is easy to see that

$$u > \frac{4n-1 - \sqrt{16n^2 + 1 - 8n\sqrt{n-1}}}{4\sqrt{n-1}} = \varphi(n),$$

438 which is again a contradiction and this completes the proof for the upper bound.

We have just proved that  $\sqrt{n} - \varphi(n) > W_n > \sqrt{n} - 1/4$ . In particular, this implies that  $\varphi(n) < 1/4$ . Taking the limit in the numerator of expression (16) it is easy to see that the



leading order is

$$\lim_{n \rightarrow \infty} 4n - 1 - \sqrt{16n^2 + 1 - 8n\sqrt{n-1}} = \lim_{n \rightarrow \infty} \frac{(4n-1)^2 - (16n^2 + 1 - 8n\sqrt{n-1})}{4n-1 + \sqrt{16n^2 + 1 - 8n\sqrt{n-1}}} = \lim_{n \rightarrow \infty} \sqrt{n-1},$$

439 which shows that

$$\lim_{n \rightarrow \infty} \varphi(n) = \frac{1}{4} \quad (20)$$

440 and the proof is complete.  $\square$

441 Note that, for large communities, a very good approximation for the total biomass in a  
442 perfectly hierarchical tree is given by the formula  $W_n = \sqrt{n} - \frac{1}{4}$ .

443 The recursions in (15) for individual abundances can be easily solved in terms of total  
444 biomass  $W_n$  as

$$x_n^i = \prod_{j=i}^n \frac{j}{j + W_{j-1}}. \quad (21)$$

445 This formula gives the abundance of the  $i$ -th species (in increasing order of the tips) for  $i \geq 2$   
446 (observe that the first two species have the same abundance). Alternatively,

$$\log(x_n^i) = \sum_{j=i}^n \log\left(\frac{j}{j + W_{j-1}}\right) = - \sum_{j=i}^n \log\left(1 + \frac{W_{j-1}}{j}\right).$$

447 Approximating  $W_{j-1}$  by its lower bound,  $W_{j-1} \approx \sqrt{j-1} - 1/4$ , we find

$$\log(x_n^i) \approx - \sum_{j=i}^n \log\left(1 + \frac{\sqrt{j-1} - 1/4}{j}\right). \quad (22)$$

448 Cutting the series for  $\log(1+x)$  at second order and considering only the leading term, with  
449 respect to  $j$  for the quadratic term, we get:

$$\log(x_n^k) \approx - \sum_{j=k}^n \frac{\sqrt{j-1}}{j} - \frac{1}{4j} - \frac{1}{2} \frac{j-1}{j^2} \approx - \sum_{j=k}^n \frac{1}{\sqrt{j}} - \frac{3}{4j}. \quad (23)$$

450 By the Euler-Maclaurin formula we obtain:

$$\log(x_n^k) \approx 2(\sqrt{n} - \sqrt{j-1}) + \frac{3}{4}(\log(n) - \log(j-1)). \quad (24)$$

451 and we can further refine the first terms  $x_n^k$  for  $k$  small by replacing the actual value  $W_j$ .

## 452 Perfectly balanced tree

453 The total biomass for perfectly balanced trees is easier to derive because the covariance matrix  
 454 has constant row sums in that case. To show this statement, order tree splits by the time they  
 455 happen ( $t_1 < \dots < t_q$ ). At each time  $t_i$ , the number of lineages doubles, so we get a total of  
 456  $n = 2^q$  species. As species interact by their shared evolutionary time, in this case each species  
 457 shares the time with  $2^{q-k}$  other species. Now let  $s_k = \sum_{i=1}^k \Delta t_i$ ,  $\Delta t_i$  being the inter-branching  
 458 time—compare the different notation for  $s_k$  here and in the previous subsection. Summing  
 459 over all possible split times we get the sum over any row of  $A$  (observe that  $A_{ii} = 1$ ),

$$r_q = \sum_{j=1}^n A_{ij} = 1 + \sum_{k=1}^q 2^{q-k} s_k, \quad (25)$$

460 which is independent of  $i$ . Because row sums are constant, the vector of equilibrium abun-  
 461 dances can be written as  $\mathbf{x}_n = x \mathbf{1}_n$ , and substitution into  $\sum_n \mathbf{x}_n = \mathbf{1}_n$  yields  $r_q x = 1$ . There-  
 462 fore, individual abundances at equilibrium are constant and given by  $x = r_q^{-1}$ . Consequently,  
 463 the total biomass at equilibrium,  $W_q$ , is simply given by

$$W_q = \frac{2^q}{1 + \sum_{k=1}^q 2^{q-k} s_k}. \quad (26)$$

464 By our assumption of ultrametric trees, we have  $s_k < 1$  (we need to add the tip lengths  
 465 to sum up to one). In the particular case of equal inter-branching times,  $\Delta t_i = \frac{1}{q+1}$ , then  
 466  $s_k = \frac{k}{q+1}$  and

$$r_q = 1 + \frac{2^{q-1}}{q+1} \sum_{k=1}^q \frac{k}{2^{k-1}}. \quad (27)$$

467 Observe that

$$\sum_{k=1}^q \frac{k}{2^{k-1}} = \frac{\partial}{\partial x} \left( \frac{1 - x^{q+1}}{1 - x} \right) \Big|_{x=\frac{1}{2}} = 4 \left( 1 - \frac{1}{2^q} \left( q + 1 - \frac{q}{2} \right) \right). \quad (28)$$

468 Thus,

$$r_q = 1 + \frac{2^{q+1} - q - 2}{q + 1} = \frac{2^{q+1} - 1}{q + 1}, \quad (29)$$

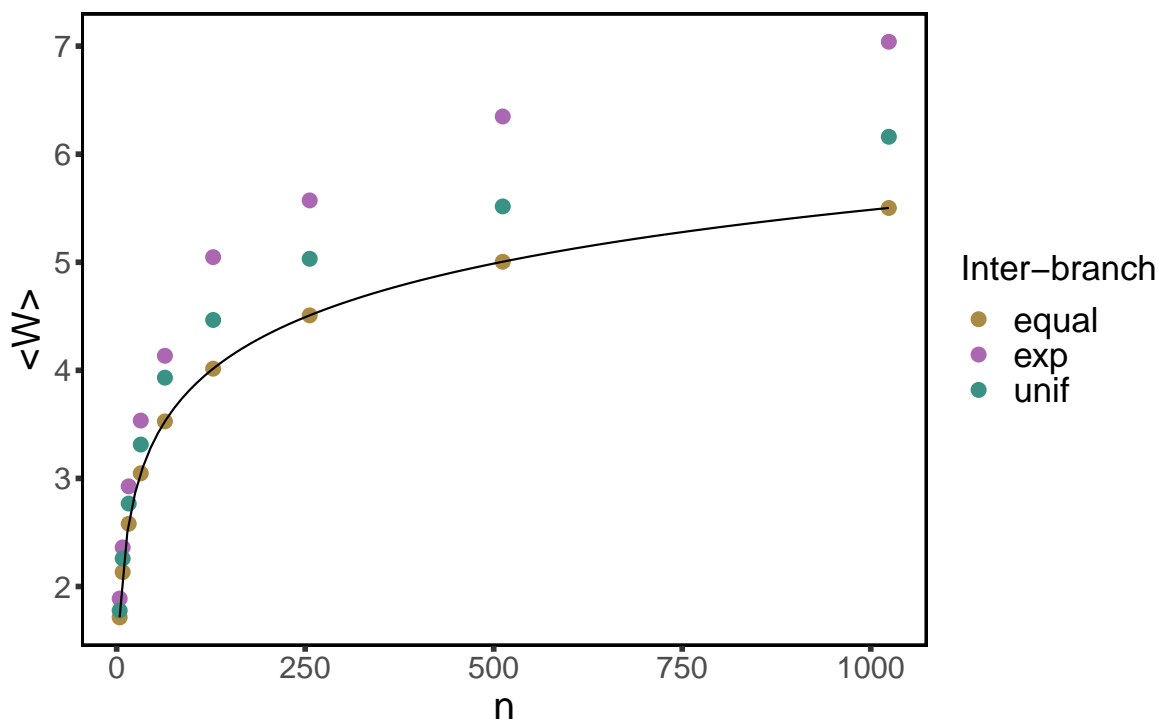

Figure 9: **Total biomass for the perfectly balanced tree.** Dots mark the average values over simulations when sampling branch lengths from an exponential distribution with rate 1, a uniform  $[0, 1]$  distribution, and the case of equal branch lengths, for which the analytical prediction (31) is shown with a solid line.

469 and the total biomass reads

$$W_q = \frac{q + 1}{2 - 2^{-q}}. \quad (30)$$

470 Let  $n = 2^q$  be the number of species, then the number of tree splits is  $q = \log_2(n)$ . In terms  
471 of the number of species, the formula is given by

$$W_n = \frac{\log_2(n) + 1}{2 - 1/n}, \quad (31)$$

472 which grows logarithmically with  $n$ . Fig. 9 compares the case of perfectly balanced trees for  
473 equal branching times with two cases, in which sampling times are drawn from exponential  
474 and uniform distributions.

### 475 3 Number of coexisting species

476 We have shown above that, in the  $\ell \rightarrow \infty$  limit, full coexistence is guaranteed. To study species  
477 coexistence for finite  $\ell \geq n$  we use the fact that  $A$  follows the Wishart distribution. As in [33],  
478 first we will compute the probability of the equilibrium point being feasible, i.e., where all  
479 species survive. Second, since the attractor is unique (it is the only saturated equilibrium point  
480 that appears), we can calculate the probability that the equilibrium point cannot be invaded  
481 by the remaining species in the pool. Then we will show that the probability of feasibility  
482 and non-invasibility factors into the corresponding product, which yields the distribution of  
483 the number of species that coexist, as well as the expected number of species that survive.

484 Because matrix  $A = GG^T$  is symmetric and positive definite, it is diagonally-stable [19],  
485 which implies that generalized Lotka-Volterra dynamics exhibits a single, globally stable fixed  
486 point [19], so there is a unique endpoint for the dynamics. Let us write the equilibrium  
487 abundances of the attractor, formed by  $m$  survivors, as

$$\mathbf{x}_n = \begin{pmatrix} \mathbf{x}_m \\ \mathbf{0}_{n-m} \end{pmatrix}, \quad (32)$$

488 where, without loss of generality, we have located the survivors as the first  $m$  species. Let  
489  $\{S\}_m$  denote the set of species that survive (i.e., the support of the endpoint). Therefore, the  
490 attractor can be fully characterized by two conditions [33]:

- 491 • Define the vector  $\mathbf{z}_n = \mathbf{1}_n - A\mathbf{x}_n = (z_n^i)$  with components  $z_n^i$ . Then it holds: first,  
492  $z_n^i = 0$  for all species  $i \in \{S\}_m$ , which simply states that equilibrium abundances of  
493 survivors satisfy the linear system  $A_m\mathbf{x}_m = \mathbf{1}_m$ , for  $A_m$  the submatrix of  $A$  restricted  
494 to the support  $\{S\}_m$ . Second, it also holds that  $z_n^i < 0$  for all species  $i \notin \{S\}_m$ , i.e., the  
495 fixed point *cannot be invaded* by the remaining species outside the endpoint. We have,  
496 therefore, a fixed point that cannot be invaded.
- 497 • The equilibrium point has to be *feasible*, i.e.,  $\mathbf{x}_m > \mathbf{0}_m$  —here we use the notation that  
498 vectors  $\mathbf{a} > \mathbf{b}$  if all inequalities are satisfied component-wise.

499 Since matrix  $A$  belongs to the Wishart ensemble, these two conditions are to be understood in  
500 statistical terms. In the following subsections we are going to compute exact formulae for the

501 probability that all the species in the pool form a *feasible* attractor, and the probability that  
 502 an endpoint formed by  $m$  species remains *non-invasible*. Using the properties of the Wishart  
 503 ensemble [30], we will calculate separately the probabilities of feasibility and non-invasibility,  
 504 and with them we will obtain the distribution of the number of species that survive.

### 505 Probability of feasibility

506 Let  $n$  be the number of species in the community and  $\ell$  the number of traits, and define  
 507  $\gamma := \ell/n$  as the ratio between the number of traits and the size of the pool. An equilibrium  
 508 point for the system such that all species coexist satisfies:

$$A\mathbf{x}_n = \mathbf{1}_n, \text{ with } x_n^i > 0 \text{ for all } i = 1, \dots, n. \quad (33)$$

509 The probability of feasibility is then the probability that  $A^{-1}\mathbf{1}_n$  has all entries greater than  
 510 0. Observe that interaction matrix is defined as  $A = \frac{1}{\ell}GG^T$  in the main text. Since rescaling  
 511 by a positive constant in  $A$  does not affect the condition for feasibility, we can forget about  
 512 the rescaling by the number of traits  $\ell$ .

513 Let  $A \sim \mathcal{W}_n(\Sigma, \ell)$  and  $L_{n-1} = (I_{n-1}, \mathbf{0}_{n-1})$  be a rectangular  $(n-1) \times n$  matrix with 0 in  
 514 its last column,  $I_k$  being the  $k \times k$  identity matrix. Then equation (2) of [22] (similarly stated  
 515 in the proof of Theorem 1 in [8]) implies that

$$\tilde{\mathbf{x}} := \frac{L_{n-1}A^{-1}\mathbf{1}_n}{\mathbf{1}_n^T A^{-1}\mathbf{1}_n} \sim t_{n-1} \left( \ell - n + 2, \frac{L_\ell \Sigma^{-1} \mathbf{1}_n}{\mathbf{1}_n^T \Sigma^{-1} \mathbf{1}_n}, \frac{L_{n-1} R_1 L_{n-1}^T}{(\ell - n + 2) \mathbf{1}_n^T \Sigma^{-1} \mathbf{1}_n} \right), \quad (34)$$

516 where  $t_p(\nu, \boldsymbol{\mu}, \Lambda)$  is a multivariate,  $p$ -dimensional  $t$  distribution with  $\nu$  degrees of freedom,  
 517 localization vector  $\boldsymbol{\mu}$  and dispersion matrix  $\Lambda$  [34]. Matrix  $R_1$  is given by

$$R_1 = \Sigma^{-1} - \frac{\Sigma^{-1} \mathbf{1}_n \mathbf{1}_n^T \Sigma^{-1}}{\mathbf{1}_n^T \Sigma^{-1} \mathbf{1}_n}. \quad (35)$$

518 Up to a normalization by a positive constant (which is precisely the total biomass,  $\mathbf{1}_n^T A^{-1} \mathbf{1}_n$ ,  
 519 given that  $A$  is positive definite), vector  $\tilde{\mathbf{x}} = (\tilde{x}_i)$  precisely gives the abundances of the *first*  
 520  $n-1$  species. Moreover, the last (normalized) abundance is expressed as  $1 - \mathbf{1}_{n-1}^T \tilde{\mathbf{x}}$ , so the

521 probability of feasibility turns out to be

$$P_f(n) = \int d^{n-1} \tilde{\mathbf{x}} f(\tilde{\mathbf{x}}) \Theta(1 - \mathbf{1}^T \tilde{\mathbf{x}}) \prod_{i=1}^{n-1} \Theta(\tilde{x}_i), \quad (36)$$

522 for  $f(\tilde{\mathbf{x}})$  the probability density function of the multivariate  $t$  distribution defined in (34).

523 Because a multivariate  $t$  distribution is the ratio between a multivariate Gaussian and  
 524 the square root of a chi-square distribution, it holds that if  $\tilde{\mathbf{x}} \sim t_p(\nu, \boldsymbol{\mu}, \Lambda)$ , then we have  
 525 that  $\tilde{\mathbf{x}} = \mathbf{y}/\sqrt{u/\nu} + \boldsymbol{\mu}$ , where  $\mathbf{y} \sim \mathcal{N}(\mathbf{0}, \Lambda)$  is a multivariate Gaussian and  $u \sim \chi_\nu^2$ , which is  
 526 independent of  $\mathbf{y}$ . Therefore, conditioning on  $u$ , we find that  $\mathbf{y}_u := \tilde{\mathbf{x}}|u \sim \mathcal{N}(\boldsymbol{\mu}, \nu\Lambda/u)$  and  
 527 we can transform the integral above to get

$$P_f(n) = \int_0^\infty du g(\nu, u) \Pr(\mathbf{y}_u > \mathbf{0}_{n-1}, \mathbf{1}_{n-1}^T \mathbf{y}_u < 1), \quad (37)$$

528 where  $u \sim \chi_\nu^2$ ,  $g(\nu, u)$  is the corresponding pdf with  $\nu = \ell - n + 2$ , and the random variable  
 529  $\mathbf{y}_u$  is distributed as a multivariate normal,

$$\mathbf{y}_u \sim \mathcal{N}\left(\frac{L_{n-1}\Sigma^{-1}\mathbf{1}_n}{\mathbf{1}_n^T\Sigma^{-1}\mathbf{1}_n}, \frac{L_{n-1}R_1L_{n-1}^T}{u\mathbf{1}_n^T\Sigma^{-1}\mathbf{1}_n}\right). \quad (38)$$

530 In this way, all the dependence in the number of traits  $\ell$  remains included in the chi-square  
 531 distribution. Eqs. (37) and (38) yield the probability of feasibility for an arbitrary covariance  
 532 matrix  $\Sigma$ . An explicit calculation of the probability of feasibility amount to evaluating the  
 533 probability  $\Pr(\mathbf{y}_u > \mathbf{0}_{n-1}, \mathbf{1}_{n-1}^T \mathbf{y}_u < 1)$ . This can be done explicitly for the case of constant,  
 534 non-negative correlation.

### 535 **Constant, non-negative correlation**

536 Consider the covariance matrix  $\Sigma = (1 - \rho)I_n + \rho\mathbf{1}_n\mathbf{1}_n^T$  with  $\rho \geq 0$ . Then (38) simplifies to:

$$\mathbf{y}_u \sim \mathcal{N}\left(\frac{1}{n}\mathbf{1}_{n-1}, \frac{1 - \rho + n\rho}{un(1 - \rho)}\left(I_{n-1} - \frac{1}{n}\mathbf{1}_{n-1}\mathbf{1}_{n-1}^T\right)\right). \quad (39)$$

537 Let us define

$$\alpha_u := \frac{1 - \rho + n\rho}{un(1 - \rho)} \text{ and } \beta_u := \frac{\alpha_u}{n}. \quad (40)$$

538 In this way, the covariance matrix  $\Sigma_u$  in (39) can be expressed as  $\Sigma_u = \alpha_u I_{n-1} - \beta_u \mathbf{1}_{n-1} \mathbf{1}_{n-1}^T$ .  
 539  $\Sigma_u$  has two eigenvalues,  $\alpha_u$  and  $\alpha_u + (n-1)\beta_u$ . The first has multiplicity  $n-1$ , and the  
 540 second 1. Hence the determinant follows immediately,

$$|\Sigma_u| = \alpha_u^{n-2} (\alpha_u - (n-1)\beta_u). \quad (41)$$

541 The inverse can be easily calculated:

$$\Sigma_u^{-1} = \frac{1}{\alpha_u} \left( I + \frac{\beta_u}{\alpha_u - (n-1)\beta_u} \mathbf{1}_{n-1} \mathbf{1}_{n-1}^T \right). \quad (42)$$

542 Therefore we can write the pdf for the random variable  $y_u$  as

$$f_u(\mathbf{y}) = K e^{-\frac{1}{2}(\mathbf{y} - \frac{1}{n} \mathbf{1}_{n-1})^T \Sigma_u^{-1} (\mathbf{y} - \frac{1}{n} \mathbf{1}_{n-1})} = K e^{-\frac{1}{2\alpha_u} \left( \|\mathbf{y} - \frac{1}{n} \mathbf{1}_{n-1}\|^2 + \frac{\beta_u}{\alpha_u - (n-1)\beta_u} (\mathbf{1}_{n-1}^T (\mathbf{y} - \frac{1}{n} \mathbf{1}_{n-1}))^2 \right)} \quad (43)$$

543 for  $K = (2\pi)^{-(n-1)/2} |\Sigma_u|^{-1/2}$ . First we have to compute the probability

$$p(u) := \Pr(\mathbf{y}_u > \mathbf{0}_{n-1}, \mathbf{1}_{n-1}^T \mathbf{y}_u < 1) = \int_{\mathbb{R}^{n-1}} d^{n-1} \mathbf{y} f_u(\mathbf{y}) \Theta(1 - \mathbf{1}_{n-1}^T \mathbf{y}) \prod_{i=1}^{n-1} \Theta(y_i), \quad (44)$$

544 with  $\Theta(x)$  the Heaviside step function, defined as  $\Theta(x) = 1$  if  $x \geq 0$  and  $\Theta(x) = 0$  if  $x < 0$ .

545 Thus after a change of variables  $\mathbf{y}' = \mathbf{y} - \frac{1}{n} \mathbf{1}_{n-1}$ , we have

$$p(u) = K \int_{\mathbb{R}^{n-1}} d^{n-1} \mathbf{y} e^{-\frac{1}{2\alpha_u} (\|\mathbf{y}\|^2 + (\mathbf{1}_{n-1}^T \mathbf{y})^2)} \Theta\left(\frac{1}{n} - \mathbf{1}_{n-1}^T \mathbf{y}\right) \prod_{i=1}^{n-1} \Theta\left(y_i + \frac{1}{n}\right), \quad (45)$$

546 where we have omitted primes to ease notation and we have used (40) to see that

$$\frac{\beta_u}{\alpha_u - (n-1)\beta_u} = 1. \quad (46)$$

547 To simplify the term  $(\mathbf{1}_{n-1}^T \mathbf{y})^2$  in the exponential, we introduce a Dirac's delta function,

$$p(u) = K \int_{\mathbb{R}^{n-1}} d^{n-1} \mathbf{y} \int_{\mathbb{R}} d\omega e^{-\frac{1}{2\alpha_u} (\|\mathbf{y}\|^2 + \omega^2)} \delta(\omega - \mathbf{1}_{n-1}^T \mathbf{y}) \Theta\left(\frac{1}{n} - \omega\right) \prod_{i=1}^{n-1} \Theta\left(y_i + \frac{1}{n}\right), \quad (47)$$

548 and use its integral representation,

$$\delta(\omega - \mathbf{1}_{n-1}^T \mathbf{y}) = \frac{1}{2\pi} \int_{\mathbb{R}} d\xi e^{-i\xi(\omega - \mathbf{1}_{n-1}^T \mathbf{y})}. \quad (48)$$

549 This transformation, together with an interchange in the order of integration, yields the  
550 following expression for  $p(u)$ :

$$p(u) = \frac{K}{2\pi} \int_{\mathbb{R}} d\omega \int_{\mathbb{R}} d\xi \int_{\mathbb{R}^{n-1}} d^{n-1} \mathbf{y} e^{-\frac{1}{2\alpha_u} (\|\mathbf{y}\|^2 + \omega^2) + i(\mathbf{1}_{n-1}^T \mathbf{y} - \omega)\xi} \Theta\left(\frac{1}{n} - \omega\right) \prod_{i=1}^{n-1} \Theta\left(y_i + \frac{1}{n}\right). \quad (49)$$

551 Apparently we are increasing the complexity of the integral, but rearranging terms we observe  
552 that

$$p(u) = \frac{K}{2\pi} \int_{\mathbb{R}} d\xi \int_{\mathbb{R}} d\omega e^{-\frac{\omega^2}{2\alpha_u} - i\omega\xi} \Theta\left(\frac{1}{n} - \omega\right) \int_{\mathbb{R}^{n-1}} d^{n-1} \mathbf{y} e^{-\frac{\|\mathbf{y}\|^2}{2\alpha_u} + i\xi \mathbf{1}_{n-1}^T \mathbf{y}} \prod_{i=1}^{n-1} \Theta\left(y_i + \frac{1}{n}\right), \quad (50)$$

553 and the integral over  $\mathbf{y}$  factorizes,

$$p(u) = \frac{K}{2\pi} \int_{\mathbb{R}} d\xi \int_{-\infty}^{1/n} d\omega e^{-\frac{\omega^2}{2\alpha_u} - i\omega\xi} \left( \int_{-1/n}^{\infty} dy e^{-\frac{y^2}{2\alpha_u} + iy\xi} \right)^{n-1}. \quad (51)$$

554 Now, in the integral over  $\omega$ , change to the variable  $\omega' = -\omega$  to get

$$p(u) = \frac{K}{2\pi} \int_{\mathbb{R}} d\xi \int_{-1/n}^{\infty} d\omega e^{-\frac{\omega^2}{2\alpha_u} + i\omega\xi} \left( \int_{-1/n}^{\infty} dy e^{-\frac{y^2}{2\alpha_u} + iy\xi} \right)^{n-1} = \frac{K}{2\pi} \int_{\mathbb{R}} d\xi \left( \int_{-1/n}^{\infty} dy e^{-\frac{y^2}{2\alpha_u} + iy\xi} \right)^n. \quad (52)$$

555 Let

$$\Phi(x) := \frac{1}{2} \left( 1 + \operatorname{erf}(x/\sqrt{2}) \right) \quad (53)$$

556 be the cdf of the standard Gaussian distribution, which can be extended to the complex plane.

557 Then it holds that

$$\int_{-1/n}^{\infty} dy e^{-\frac{y^2}{2\alpha_u} + iy\xi} = \sqrt{2\pi\alpha_u} e^{-\frac{\alpha_u \xi^2}{2}} \Phi\left(\frac{1/n + i\alpha_u \xi}{\sqrt{\alpha_u}}\right). \quad (54)$$



558 Therefore, the sought probability can be written as

$$p(u) = \frac{K(2\pi\alpha_u)^{n/2}}{2\pi} \int_{\mathbb{R}} d\xi e^{-\frac{n\alpha_u\xi^2}{2}} \Phi\left(\frac{1/n + i\alpha_u\xi}{\sqrt{\alpha_u}}\right)^n. \quad (55)$$

559 An alternative way to express the integral over  $\xi$  it is to consider a path  $\Gamma$  in the complex  
 560 plane such that  $\Gamma = \{z \in \mathbb{C} | z = x_0 + i\xi\}$  and then reducing the result to the limit  $x_0 \rightarrow 0$ , so  
 561 that the integral over the imaginary axis is well defined. In practice, this amounts to change  
 562 to the variable  $\zeta = i\xi$ . Consequently, an equivalent form of writing this equation is

$$p(u) = -i\sqrt{\frac{n\alpha_u}{2\pi}} \int_{\Gamma} d\zeta e^{\frac{n\alpha_u\zeta^2}{2}} \Phi\left(\frac{1/n + \alpha_u\zeta}{\sqrt{\alpha_u}}\right)^n, \quad (56)$$

563 where we have used that  $K = \sqrt{n}(2\pi\alpha_u)^{-(n-1)/2}$  in this case. Finally, according to (37),  
 564 in the case of constant, positive correlation the probability of feasibility is given by a two  
 565 dimensional integral,

$$P_f(n) = -i\sqrt{\frac{n}{2\pi}} \int_0^\infty du g(\nu, u) \sqrt{\alpha_u} \int_{\Gamma} d\zeta e^{\frac{n\alpha_u\zeta^2}{2}} \Phi\left(\frac{1/n + \alpha_u\zeta}{\sqrt{\alpha_u}}\right)^n, \quad (57)$$

566 where  $g(\nu, u)$  is the pdf of the chi-square distribution with  $\nu = \ell - n + 2$  degrees of free-  
 567 dom. Fig. 3 compares this exact formula with numerical simulation for different values of the  
 568 correlation.

### 569 Probability of non-invasibility

570 In this subsection we compute the probability that an attractor formed by  $m \leq n$  species  
 571 cannot be invaded by the remaining  $n - m$  species. Let  $A \sim W_n(\Sigma, \ell)$ . Observe that for  
 572 invasibility the rescaling of interaction matrix as  $A = \frac{1}{\ell}GG^T$  does not matter. Partition  
 573 matrices  $A$  and  $\Sigma$  in four blocks as follows:

$$A = \begin{pmatrix} A_{11} & A_{12} \\ A_{21} & A_{22} \end{pmatrix}, \quad \Sigma = \begin{pmatrix} \Sigma_{11} & \Sigma_{12} \\ \Sigma_{21} & \Sigma_{22} \end{pmatrix}, \quad (58)$$

574 where  $\Sigma_{11}$  refers to the species that belong to the support  $\{S\}_m$  of the attractor,  $\Sigma_{22}$  is  
 575 related to those species outside the attractor, and off-diagonal matrices are formed by the

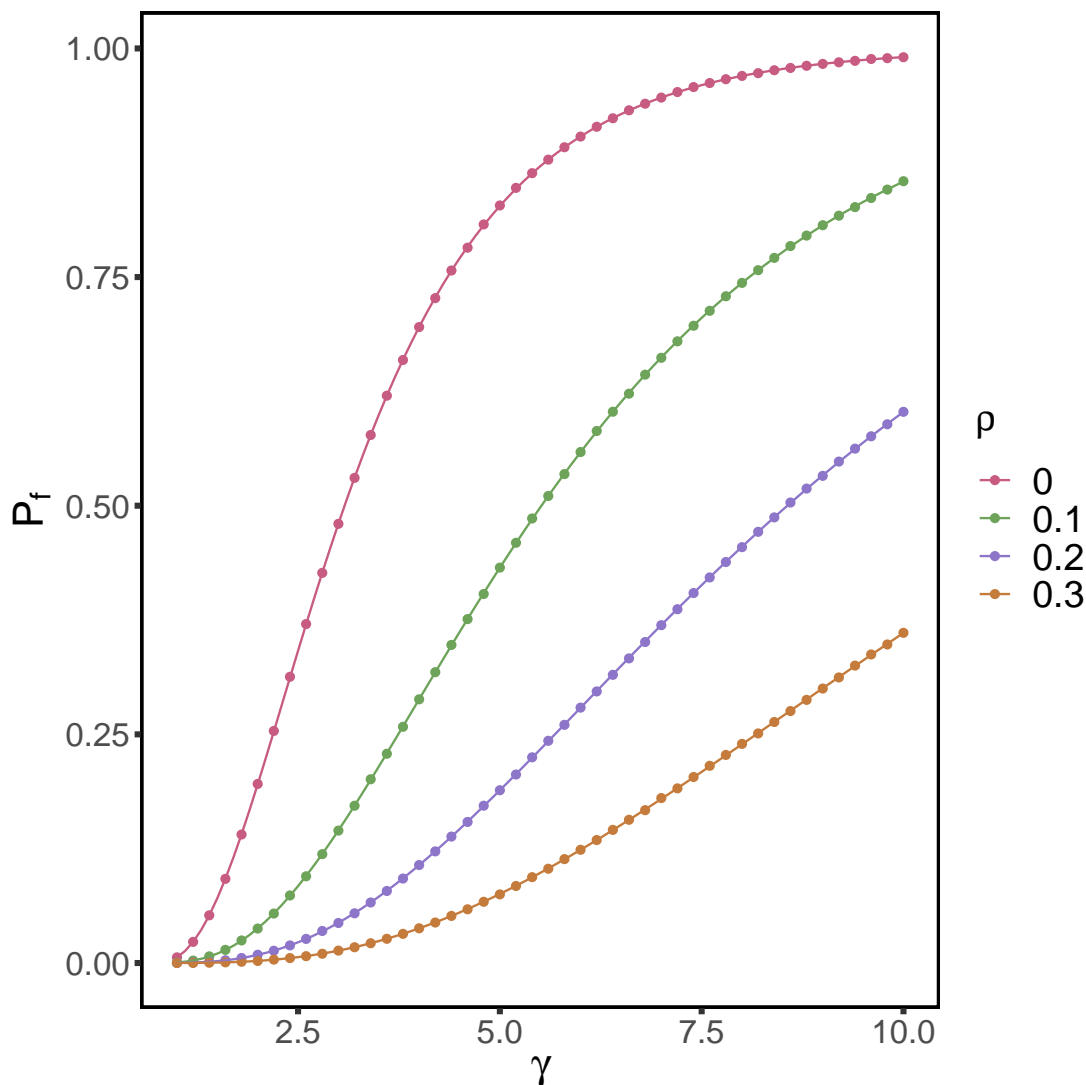

Figure 10: **Probability of feasibility as a function of the ratio  $\gamma$  of number of traits to number of species for different *constant* correlation matrices.** The simulations were done with  $n = 10$  species. Dots are simulations, solid lines are numerical evaluations of the exact formula (57). The larger the correlation, the slower curves approach to one in the deterministic limit  $\gamma \rightarrow \infty$ .

576 corresponding rows and columns in  $\{S\}_m$  and  $\{S\}_n \setminus \{S\}_m$ , and *vice versa*. The exact same  
 577 notation applies to blocks in  $A$ .

578 Then by theorem 3.2.10 of [30] we have that

$$A_{21}|A_{11} \sim \mathcal{N}(\Sigma_{21}\Sigma_{11}^{-1}A_{11}, \Sigma_{22.1} \otimes A_{11}), \quad (59)$$

579 where  $\Sigma_{22.1} = \Sigma_{22} - \Sigma_{21}\Sigma_{11}^{-1}\Sigma_{12}$  is the Schur complement of  $\Sigma_{22}$ ,  $\otimes$  is the tensor product of  
 580 matrices, and the normal distribution appearing is meant to be understood as the distribution  
 581 of the *flatten* matrix  $A_{21}$ . By the properties of the normal distribution it follows that

$$\begin{aligned} A_{21}A_{11}^{-1}|A_{11} &\sim \mathcal{N}(\Sigma_{21}\Sigma_{11}^{-1}, \Sigma_{22.1} \otimes A_{11}^{-1}), \\ A_{21}A_{11}^{-1}\mathbf{1}_m|A_{11} &\sim \mathcal{N}(\Sigma_{21}\Sigma_{11}^{-1}\mathbf{1}_m, \mathbf{1}_m^T A_{11}^{-1} \mathbf{1}_m \Sigma_{22.1}). \end{aligned} \quad (60)$$

582 In order to get the last line, we first transpose the matrix, then notice that the  $\mathbf{1}_m^T$  operator acts  
 583 on the vector of elements of the matrix as  $I_m \otimes \mathbf{1}^T$ . Hence by the property  $(A \otimes B)(C \otimes D) =$   
 584  $AC \otimes BD$  of the tensor product the second statement above follows.

As mentioned at the begining of Sec. 3, the probability that the attractor cannot be invaded  
 by any species in  $\{S\}_n \setminus \{S\}_m$  coincides with the probability that  $\mathbf{z} = \mathbf{1}_{n-m} - A_{21}A_{11}^{-1}\mathbf{1}_m <$   
 $\mathbf{0}_{n-m}$ . Define  $W := \mathbf{1}_m^T A_{11}^{-1} \mathbf{1}_m$  and  $f_W(w)$  as the pdf of the random variable  $W$ , which is  
 non-negative. Then

$$\begin{aligned} P_{\text{ni}}(m, n) &= \int_0^\infty dw f_W(w) \Pr(\mathbf{z} < \mathbf{0} | W = w) \\ &= \int_0^\infty dw f_W(w) \int_{\mathcal{V}_w^+} dA_{11} \Pr(A_{11} | W = w) \Pr(\mathbf{z} < \mathbf{0} | A_{11}, W = w), \end{aligned} \quad (61)$$

585 where  $\mathcal{V}^+$  is the set of positive definite symmetric matrices and  $\mathcal{V}_w^+$  the set conditional to  
 586  $W = \mathbf{1}_m^T A_{11}^{-1} \mathbf{1}_m = w$ . Using that  $\mathbf{z} = \mathbf{1}_{n-m} - A_{21}A_{11}^{-1}\mathbf{1}_m$  and (60), the conditional variable  
 587  $\mathbf{z}|A_{11}, W = w$  is distributed as

$$\mathbf{z}|A_{11}, W = w \sim \mathcal{N}(\mathbf{1}_{n-m} - \Sigma_{21}\Sigma_{11}^{-1}\mathbf{1}_m, w\Sigma_{22.1}), \quad (62)$$

588 which does not depend explicitly on  $A_{11}$ . Neither does  $\Pr(\mathbf{z} < \mathbf{0} | A_{11}, W = w)$ , so we can  
 589 factor this probability out of the integration over  $A_{11}$ . In this way, we can write

$$P_{\text{ni}}(m, n) = \int_0^\infty dw f_W(w) Q_{n-m}^-(\mathbf{1}_{n-m} - \Sigma_{21}\Sigma_{11}^{-1}\mathbf{1}_m, w\Sigma_{22.1}), \quad (63)$$

590 because  $\int_{\mathcal{V}_w^+} dA_{11} \Pr(A_{11} | W = w) = 1$ . In (63) we have defined  $Q_p^-$  as the probability that a  
 591 multivariate Gaussian variable with the specified parameters is contained in the fully negative

592 orthant,

$$Q_p^-(\boldsymbol{\mu}, \Lambda) := (2\pi)^{-p/2} |\Lambda|^{-1/2} \int_{\mathbb{R}_+^n} d\mathbf{y} e^{-\frac{1}{2}(\mathbf{y}-\boldsymbol{\mu})^T \Lambda^{-1}(\mathbf{y}-\boldsymbol{\mu})}. \quad (64)$$

593 Corollary 3.2.6 in [30] implies that  $A_{11} \sim \mathcal{W}_m(\Sigma, \ell)$ . Therefore, theorem 3.2.12 in the  
594 same reference holds, which ensures that

$$W^{-1} \mathbf{1}_m^T \Sigma_{11}^{-1} \mathbf{1}_m = \frac{\mathbf{1}_m^T \Sigma_{11}^{-1} \mathbf{1}_m}{\mathbf{1}_m^T A_{11}^{-1} \mathbf{1}_m} \sim \chi_{\ell-m+1}^2. \quad (65)$$

595 This means that

$$g(\nu', w) = -w^{-2} \mathbf{1}_m^T \Sigma_{11}^{-1} \mathbf{1}_m f_W(w^{-1} \mathbf{1}_m^T \Sigma_{11}^{-1} \mathbf{1}_m), \quad (66)$$

596 for  $g(\nu, w)$  the pdf of a  $\chi_{\nu'}^2$  distribution with  $\nu' = \ell - m + 1$  degrees of freedom. Now, making  
597 the change of variable  $w' = w^{-1} \mathbf{1}_m^T \Sigma_{11}^{-1} \mathbf{1}_m$  in (63) we finally get

$$P_{\text{ni}}(m, n) = \int_0^\infty dw g(\nu', w) Q_{n-m}^-(\mathbf{1}_{n-m} - \Sigma_{21} \Sigma_{11}^{-1} \mathbf{1}_m, w^{-1} \mathbf{1}_m^T \Sigma_{11}^{-1} \mathbf{1}_m \Sigma_{22.1}). \quad (67)$$

598 As for the case of feasibility, (67) is an exact formula for the probability that an endpoint  
599 composed by  $m$  species cannot be invaded by the remaining  $n - m$  species. Similarly, the  
600 multidimensional integral associated to  $Q_{n-m}^-$  can be reduced to a single integral in the case  
601 of constant, non-negative correlation, as we show in the following subsection. Thus, in that  
602 particular case, the probability of non-invasibility is expressed as a double integral.

### 603 Constant, non-negative correlation

604 In the case of constant, non-negative correlation, (67) simplifies to:

$$P_{\text{ni}}(m) = \int_0^\infty dw g(\nu', w) Q_{n-m}^-(\boldsymbol{\mu}, \Sigma_w) \quad (68)$$

605 with

$$\begin{aligned} \boldsymbol{\mu} &= \frac{1 - \rho}{1 - \rho + m\rho} \mathbf{1}_{n-m}, \\ \Sigma_w &= \frac{m(1 - \rho)}{w(1 - \rho + m\rho)} \left( I_{n-m} + \frac{\rho}{1 - \rho + m\rho} \mathbf{1}_{n-m} \mathbf{1}_{n-m}^T \right). \end{aligned} \quad (69)$$

606 Now focus on the probability  $Q_{n-m}^-$ . Making the substitution  $\mathbf{y}' = k\mathbf{y}$  in (64) it is easy to  
 607 show that

$$Q_p^-(\boldsymbol{\mu}, \Lambda) = Q_p^-(\boldsymbol{\mu}/k, \Lambda/k^2). \quad (70)$$

608 Therefore, for  $k = \frac{m(1-\rho)}{1-\rho+m\rho}$  we recover Eq. (84) with  $\boldsymbol{\mu}$  and  $\Lambda$  given by

$$\boldsymbol{\mu} = \frac{1}{m}\mathbf{1}_{n-m}, \quad \Sigma_w = \frac{1-\rho+m\rho}{mw(1-\rho)} \left( I_{n-m} + \frac{\rho}{1-\rho+m\rho} \mathbf{1}_{n-m} \mathbf{1}_{n-m}^T \right). \quad (71)$$

609 Now let us write  $\Sigma_w := \alpha_w I_{n-m} + \beta_w \mathbf{1}_{n-m} \mathbf{1}_{n-m}^T$ , with  $\alpha_w := \frac{1-\rho+m\rho}{mw(1-\rho)}$ ,  $\beta_w := \frac{\rho\alpha_w}{1-\rho+m\rho}$ .  
 610 As we did for the probability of feasibility, the probability  $Q_{n-m}^-$  can be written as a one-  
 611 dimensional integral. For that is crucial that, contrary to what happened in the case of  
 612 feasibility, correlations given by  $\Sigma_w$  are positive —notice the plus sign in (71). This is due to  
 613 the special structure of  $\Sigma_w$ , which implies that the correlation between any two distinct  $y_i$ ,  
 614  $y_j$  in (64) is constant and given by  $\lambda = \frac{\rho}{1+m\rho} \geq 0$ . Hence, the following result of Tong [34]  
 615 (section 8.2.5) applies:

616 **Proposition 2.** *Let  $\mathbf{x}$  be distributed according to  $\mathcal{N}(\boldsymbol{\mu}, \Sigma)$  such that covariance matrix entries  
 617 satisfy  $\Sigma_{ii} = \sigma_i^2$  and  $\Sigma_{ij} = \sigma_i \sigma_j \lambda$ . Then, the joint probability that  $\mathbf{x} \in C := \{\mathbf{x} \in \mathbb{R}^n | b_i \leq$   
 618  $x_i \leq a_i, i = 1, \dots, n\}$ , where  $-\infty \leq b_i < a_i \leq \infty$  for  $i=1, \dots, n$ , is expressed as*

$$\Pr(\mathbf{x} \in C) = \int_{-\infty}^{\infty} dy \phi(y) \prod_{i=1}^n \left[ \Phi \left( \frac{(a_i - \mu_i)/\sigma_i + \sqrt{\lambda}y}{\sqrt{1-\lambda}} \right) - \Phi \left( \frac{(b_i - \mu_i)/\sigma_i + \sqrt{\lambda}y}{\sqrt{1-\lambda}} \right) \right] \quad (72)$$

619 for  $\phi(z)$  and  $\Phi(z)$  the pdf and cdf, respectively, of a univariate standard normal distribution.

620 In our particular case  $\sigma_i^2 = \frac{1+m\rho}{wm(1-\rho)}$ ,  $\lambda = \frac{\rho}{1+m\rho}$ ,  $b_i = -\infty$ ,  $a_i = 0$  and, according to (71),  
 621  $\mu_i = \frac{1}{m}$  for  $i = 1, \dots, n - m$ . Therefore, putting all the pieces together, we can write

$$P_{ni}(m, n) = \int_0^{\infty} dw g(w', w) \int_{-\infty}^{\infty} dy \phi(y) \Phi \left( \frac{-1/m + y\sqrt{\beta_w}}{\sqrt{\alpha_w}} \right)^{n-m}. \quad (73)$$

622 As for the probability of feasibility, in the case of constant, non-negative correlation we can  
 623 reduce it to a two-dimensional integral.

624 Notice the resemblance between the expressions for feasibility and non-invasibility —  
 625 Eqs. (57) and (73). In the case of  $\rho > 0$ , by changing  $y \rightarrow y' \frac{\alpha_w}{\sqrt{\beta_w}}$ , we can make the resemblance

626 stronger:

$$P_{\text{ni}}(m, n) = \sqrt{\frac{1 - \rho + m\rho}{2\pi\rho}} \int_0^\infty dw g(\nu', w) \sqrt{\alpha_w} \int_{-\infty}^\infty dy e^{-\frac{(1-\rho+m\rho)\alpha_w y^2}{2\rho}} \Phi\left(\frac{-1/m + y\alpha_w}{\sqrt{\alpha_w}}\right)^{n-m}. \quad (74)$$

627 Observe that the number of degrees of freedom of the  $\chi_{\nu'}^2$  distribution here is  $\nu' = \ell - m + 1$ .  
 628 Notice also that the change of variables leading to (74) does not apply for  $\rho = 0$ . This case is  
 629 trivial, however, and will not be discussed explicitly.

### 630 Sign independence of feasibility and invasibility

631 In this section we show that the joint probability of feasibility and non-invasibility factors into  
 632 the product of the two probabilities calculated above. For that purpose, it suffices to show  
 633 that

$$\Pr(\mathbf{z} < \mathbf{0}_{n-m} | A_{11}^{-1} \mathbf{1}_m > \mathbf{0}_m) = \Pr(\mathbf{z} < \mathbf{0}_{n-m}). \quad (75)$$

For that purpose we can calculate

$$\begin{aligned} \Pr(\mathbf{z} < \mathbf{0}_{n-m} | A_{11}^{-1} \mathbf{1}_m > \mathbf{0}_m) &= \int_0^\infty dw g_W(w) \Pr(\mathbf{z} < \mathbf{0}_{n-m} | A_{11}^{-1} \mathbf{1}_m > \mathbf{0}_m, W = w) \\ &= \int_0^\infty dw g_W(w) \int_{\mathcal{G}_w^+} dA_{11} \Pr(\mathbf{z} < \mathbf{0}_{n-m} | A_{11}, W = w) \Pr(A_{11} | A_{11}^{-1} \mathbf{1}_m > \mathbf{0}_m, W = w), \end{aligned} \quad (76)$$

634 where  $W = \mathbf{1}_m^T A_{11}^{-1} \mathbf{1}_m$  as for the calculation of  $P_{\text{ni}}$ , and  $g_W$  is the pdf of the random variable  
 635  $W | A_{11}^{-1} \mathbf{1}_m > \mathbf{0}_m$ . In the second line we have introduced an integral over the set  $\mathcal{G}_w^+$  of  
 636 symmetric matrices and positive definite that verify the conditions  $A_{11}^{-1} \mathbf{1}_m > \mathbf{0}_m$  and  $W =$   
 637  $\mathbf{1}_m^T A_{11}^{-1} \mathbf{1}_m = w$ . As before, by (62) we can factor the probability  $\Pr(\mathbf{z} < \mathbf{0}_{n-m} | A_{11}, W = w)$   
 638 out, so we get

$$\Pr(\mathbf{z} < \mathbf{0}_{n-m} | A_{11}^{-1} \mathbf{1}_m > \mathbf{0}_m) = \int_0^\infty dw g_W(w) Q_{n-m}^-(\mathbf{1}_{n-m} - \Sigma_{21} \Sigma_{11}^{-1} \mathbf{1}_m, w \Sigma_{22.1}), \quad (77)$$

639 which coincides with (67) except for the probability density  $g_W$ . In the last step we have used  
 640 the normalization condition  $\int_{\mathcal{G}_w^+} dA_{11} \Pr(A_{11} | A_{11}^{-1} \mathbf{1}_m > \mathbf{0}_m, W = w) = 1$ .

Observe that the condition  $A_{11}^{-1} \mathbf{1}_m > \mathbf{0}_m$  is equivalent to the conditions  $\mathbf{1}_{m-1}^T \tilde{\mathbf{x}} < 1$  and  
 $\tilde{\mathbf{x}} > \mathbf{0}_{m-1}$ , for  $\tilde{\mathbf{x}}$  the vector of the first  $m - 1$  relative abundances defined in (34). Let

$R := \{\mathbf{v} \in \mathbb{R}^{m-1} | \mathbf{1}_{m-1}^T \mathbf{v} < 1, \mathbf{v} > \mathbf{0}_{m-1}\}$  the set of vectors satisfying the two last conditions.

Then it is easy to see that

$$\begin{aligned} g_W(w) &= \frac{d}{dw} \Pr(W < w | A_{11}^{-1} \mathbf{1}_m > \mathbf{0}_m) \\ &= \frac{d}{dw} \Pr(W < w | \tilde{\mathbf{x}} \in R) = \frac{d}{dw} \Pr(W < z) = f_W(w). \end{aligned} \quad (78)$$

641 The last equality in the chain above follows because  $W$  and  $\tilde{\mathbf{x}}$  are independent random vari-  
642 ables —see the proof of theorem 1 in [8].

643 This shows that the probability of observing an endpoint with  $m$  survivors can be factored  
644 as the probability of feasibility (37) times the probability (67) that the attractor cannot be  
645 invaded by the remaining  $n - m$  species in the pool.

## 646 Distribution of the number of coexisting species

647 Due to the independence shown in the previous section, the probability that the system settles  
648 in a subset  $\{S\}_m \subset \{1, \dots, n\}$  formed by  $m$  species is simply

$$\Pr(\{S\}_m | n, \ell, \Sigma) = \binom{n}{m} P_a(m, n) = \binom{n}{m} P_f(m) P_{ni}(m, n), \quad (79)$$

649 because all subsets with cardinality  $m$  are statistically equivalent.

650 Assuming constant and non-negative correlation, in Fig. S5 we compare numerical inte-  
651 gration of Eqs. (57) and (73) appearing in (79) with simulations.

## 652 Average number of species

653 In this section we will focus on the case of constant correlation. Our aim is to approximate  
654 the integrals for feasibility and invasibility in the large number of species limit by a saddle  
655 point technique. With these approximations, we provide an analytical way to compute the  
656 probability of coexistence  $\Pr(\{S\}_m | n, \ell, \rho)$  —cf. Eq. (79)— as well as an approximation for  
657 the average fraction of species

$$\varphi(n, \ell, \rho) := \frac{1}{n} \sum_{m=0}^n \binom{n}{m} m P_a(m, n). \quad (80)$$

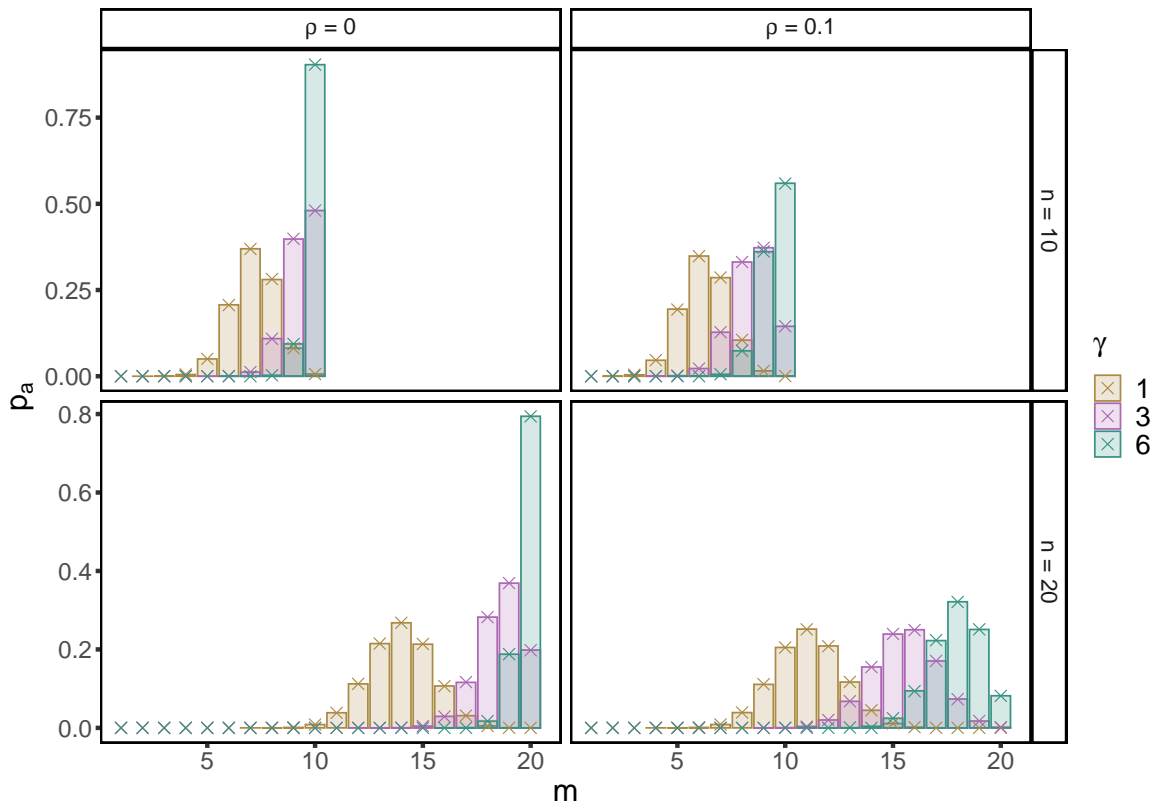

Figure 11: **Distribution of the set of coexisting species as a function of the ratio  $\gamma$  of number of traits to number of species for different *constant* correlation matrices.** The simulations were done with  $n = 10$  and  $20$  species. Bar are simulations, crosses are numerical evaluations of formula (79).

658 We distinguish the cases  $\rho > 0$  and  $\rho = 0$  for invasibility. For  $\rho > 0$  we use expression  
 659 (74). Let us define  $q := m/n$  as the fraction of survivors, and recall that  $\ell = n\gamma$ . Also let

$$\lambda_q := mw\alpha_w = 1 + \frac{m\rho}{1-\rho} = 1 + \frac{nq\rho}{1-\rho}. \quad (81)$$

660 In terms of  $\lambda_q$ , the probability of non-invasibility reads

$$P_{ni}(m, n) = \frac{\lambda_q}{\sqrt{2\pi(\lambda_q - 1)}} \int_0^\infty dw g(\nu, w) w^{-1/2} \int_{-\infty}^\infty dy e^{-\frac{y^2 \lambda_q^2}{2w(\lambda_q - 1)}} \Phi \left( -\sqrt{\frac{w}{m\lambda_q}} + y \sqrt{\frac{\lambda_q}{mw}} \right)^{n-m}. \quad (82)$$



661 Now we make a change of variables,

$$\begin{aligned} w' &= \sqrt{\frac{w}{m}}, \\ \frac{y'}{w'} &= \frac{y}{\sqrt{wm}}. \end{aligned} \quad (83)$$

662 Then the integral becomes

$$P_{\text{ni}}(m, n) = \frac{2\lambda_q}{\sqrt{2\pi(\lambda_q - 1)}} \int_0^\infty dw m^{3/2} g(\nu', mw^2) \int_{-\infty}^\infty dy e^{-\frac{my^2\lambda_q^2}{2w^2(\lambda_q-1)}} \Phi\left(-\frac{w}{\sqrt{\lambda_q}} + \frac{y}{w}\sqrt{\lambda_q}\right)^{n-m}. \quad (84)$$

663 Recall that the probability density function  $g(\nu', x)$ , for  $\nu' = \ell - m + 1$ , is:

$$g(\nu, x) = \frac{x^{(\ell-m-1)/2} e^{-x/2}}{2^{(\ell-m+1)/2} \Gamma((\ell - m + 1)/2)} \quad (85)$$

664 Hence the integral (84) is

$$\begin{aligned} P_{\text{ni}}(m, n) &= \frac{\lambda_q m}{\sqrt{\pi(\lambda_q - 1)}} \frac{(m/2)^{(\ell-m)/2}}{\Gamma((\ell - m + 1)/2)} \int_0^\infty dw w^{\ell-m-1} e^{-mw^2/2} \\ &\times \int_{-\infty}^\infty dy e^{-\frac{my^2\lambda_q^2}{2w^2(\lambda_q-1)}} \Phi\left(-\frac{w}{\sqrt{\lambda_q}} + \frac{y}{w}\sqrt{\lambda_q}\right)^{n-m} \\ &= \frac{\lambda_q m}{\sqrt{\pi(\lambda_q - 1)}} \frac{(m/2)^{(\ell-m)/2}}{\Gamma((\ell - m + 1)/2)} \int_0^\infty dw w^{-1} \int_{-\infty}^\infty dy e^{nF_{\text{ni}}(w,y)}, \end{aligned} \quad (86)$$

665 where the exponent  $F_{\text{ni}}(w, y)$  has been defined as

$$F_{\text{ni}}(w, y) := (\gamma - q) \log(w) - \frac{qw^2}{2} - \frac{qy^2\lambda_q^2}{2w^2(\lambda_q - 1)} + (1 - q) \log \Phi\left(-\frac{w}{\sqrt{\lambda_q}} + \frac{y}{w}\sqrt{\lambda_q}\right). \quad (87)$$

666 Now we evaluate the double integral in the limit  $n \rightarrow \infty$  via a saddle-point technique. For  
667 that purpose, since the exponential becomes peaked around the maximum of the exponent, we  
668 calculate the equations to be satisfied by the critical point. Taking derivatives of the exponent

669 we get

$$\begin{aligned}\frac{\partial F_{\text{ni}}}{\partial y} &= -\frac{qy\lambda_q^2}{w^2(\lambda_q - 1)} + \frac{(1-q)\sqrt{\lambda_q}}{w} \frac{\phi\left(-\frac{w}{\sqrt{\lambda_q}} + \frac{y}{w}\sqrt{\lambda_q}\right)}{\Phi\left(-\frac{w}{\sqrt{\lambda_q}} + \frac{y}{w}\sqrt{\lambda_q}\right)}, \\ \frac{\partial F_{\text{ni}}}{\partial w} &= \frac{\gamma - q}{w} - qw + \frac{qy^2\lambda_q^2}{w^3(\lambda_q - 1)} - (1-q) \left(\frac{1}{\sqrt{\lambda_q}} + \frac{y\sqrt{\lambda_q}}{w^2}\right) \frac{\phi\left(-\frac{w}{\sqrt{\lambda_q}} + \frac{y}{w}\sqrt{\lambda_q}\right)}{\Phi\left(-\frac{w}{\sqrt{\lambda_q}} + \frac{y}{w}\sqrt{\lambda_q}\right)}.\end{aligned}\tag{88}$$

670 Therefore at a critical point  $(w^*, y^*)$  we have the following conditions:

$$\begin{aligned}-\frac{qy\lambda_q^{3/2}}{w(\lambda_q - 1)} + (1-q) \frac{\phi\left(-\frac{w}{\sqrt{\lambda_q}} + \frac{y}{w}\sqrt{\lambda_q}\right)}{\Phi\left(-\frac{w}{\sqrt{\lambda_q}} + \frac{y}{w}\sqrt{\lambda_q}\right)} &= 0, \\ \gamma - q - qw^2 - \frac{qy\lambda_q}{\lambda_q - 1} &= 0.\end{aligned}\tag{89}$$

671 Similarly we can rewrite the integral for the probability that an endpoint formed by  $m$   
672 species is feasible, see Eq. (57), as

$$P_{\text{f}}(m) = -i\sqrt{\frac{\lambda_q}{2\pi}} \int_0^\infty du g(\nu, u) u^{-1/2} \int_{\Gamma} d\zeta e^{\frac{\lambda_q \zeta^2}{2u}} \Phi\left(\sqrt{\frac{u}{m\lambda_q}} + \zeta\sqrt{\frac{\lambda_q}{mu}}\right)^m,\tag{90}$$

673 where now the number of degrees of freedom is  $\nu = \ell - m + 2$ .

674 Following essentially the same procedure as before, i.e. making a change of variables and  
675 replacing the density function for the  $\chi_\nu^2$  distribution we get

$$P_{\text{f}}(m) = -im^{3/2} \sqrt{\frac{\lambda_q}{2\pi}} \frac{(m/2)^{(\ell-m)/2}}{\Gamma((\ell-m)/2 + 1)} \int_{-\infty}^\infty du \int_{\Gamma} d\zeta e^{nF_{\text{f}}(u, \zeta)},\tag{91}$$

676 with the exponent

$$F_{\text{f}}(u, \zeta) := (\gamma - q) \log(u) - \frac{qu^2}{2} + \frac{q\lambda_q\zeta^2}{2u^2} + q \log \Phi\left(\frac{u}{\sqrt{\lambda_q}} + \frac{\zeta}{u}\sqrt{\lambda_q}\right).\tag{92}$$

677 Similarly, the conditions satisfied by the critical point  $(u^*, \zeta^*)$  are

$$\frac{\zeta \sqrt{\lambda_q}}{u} + \frac{\phi\left(\frac{u}{\sqrt{\lambda_q}} + \frac{\zeta}{u} \sqrt{\lambda_q}\right)}{\Phi\left(\frac{u}{\sqrt{\lambda_q}} + \frac{\zeta}{u} \sqrt{\lambda_q}\right)} = 0, \quad (93)$$

$$\gamma - q - qu^2 - q\zeta = 0.$$

678 Notice that the product of the densities of the  $\chi^2$  distributions in each integral —Eqs. (86)

679 and (91)— introduce an extra term which scales exponentially with  $m = nq$ , namely

$$\frac{m^{\ell-m}}{2^{\ell-m} \Gamma((\ell-m)/2 + 1) \Gamma((\ell-m)/2 + 1/2)} = \frac{m^{\ell-m}}{\Gamma(\ell-m+1)}. \quad (94)$$

680 Using the Stirling's asymptotic form of the gamma function we get

$$\frac{m^{\ell-m}}{\Gamma(\ell-m+1)} \sim \frac{e^{n(\gamma-q)(1+\log q - \log(\gamma-q))}}{\sqrt{2\pi n(\gamma-q)}}. \quad (95)$$

681 Let

$$F_e(q) := (\gamma - q)(1 + \log q - \log(\gamma - q)) \quad (96)$$

682 and

$$F_c(q) := -q \log q - (1 - q) \log(1 - q), \quad (97)$$

683  $F_c(q)$  being the exponent appearing in Stirling's asymptotic formula for the binomial coefficient

684  $\binom{n}{nq}$ . Consequently the probability that the system settles in an endpoint with  $m = nq$

685 species is given, up to a normalization factor, by:

$$\Pr(\{S\}_m | n, \ell, \rho) = \binom{n}{m} P_a(m, n) \sim \exp\{n(F_f(u^*, \zeta^*, q) + F_{ni}(w^*, y^*, q) + F_e(q) + F_c(q))\}. \quad (98)$$

686 Observe that critical point coordinates  $u^*$ ,  $\zeta^*$ ,  $w^*$  and  $y^*$  depend implicitly on  $q$  through (89)

687 and (93). Observe that one can use the asymptotic expansion (98) to obtain numerically the

688 distribution of the number of survivors,  $\Pr(\{S\}_m | n, \ell, \rho)$ , up to a normalization factor. The

689 calculation amounts to solve numerically the non-linear systems (89) and (93).

690 We are now ready to provide an analytical approximation for the mean fraction of survivors

691  $\varphi$ , cf. Eq. (80). In the limit of large pool size  $n$ , we can approximate the mean of the

692 distribution  $\Pr(\{S\}_m|m, \ell, \rho)$  by its mode, which is easier to compute. In fact, to calculate  
 693 the mode of the distribution  $q$  in the large  $n$  limit we need to find the  $q^*$  value that maximizes  
 694 the exponent in (98). Due to the critical point conditions for  $(u^*, \zeta^*)$  and  $(w^*, y^*)$ ,  $q^*$  satisfies

$$\frac{\partial F_f}{\partial q} + \frac{\partial F_{ni}}{\partial q} + \frac{\partial F_e}{\partial q} + \frac{\partial F_c}{\partial q} = 0. \quad (99)$$

695 Evaluated at the critical points  $(u^*, \zeta^*)$  and  $(w^*, y^*)$ , the derivatives read

$$\begin{aligned} \frac{\partial F_{ni}}{\partial q} &= -\log(w) - \frac{w^2}{2} - \frac{y^2 \lambda_q}{2w^2} + \frac{y}{2} - \log \Phi \left( -\frac{w}{\sqrt{\lambda_q}} + \frac{y}{w} \sqrt{\lambda_q} \right), \\ \frac{\partial F_f}{\partial q} &= -\log(u) - \frac{u^2}{2} + \lambda_q \frac{\zeta^2}{2u^2} + \frac{\zeta(\lambda_q - 1)}{2\lambda_q} + \log \Phi \left( \frac{u}{\sqrt{\lambda_q}} + \frac{\zeta}{u} \sqrt{\lambda_q} \right), \\ \frac{\partial F_e}{\partial q} &= \log \left( \frac{\gamma - q}{q} \right) + \frac{\gamma - q}{q} = \log \left( \frac{\gamma - q}{q} \right) + \frac{u^2}{2} + \frac{w^2}{2} + \frac{q\zeta}{2} + \frac{qy\lambda_q}{2(\lambda_q - 1)}, \\ \frac{\partial F_c}{\partial q} &= \log(1 - q) - \log q. \end{aligned} \quad (100)$$

696 Therefore the condition for  $q^*$  reduces to

$$-\log \left( \frac{qwu}{\gamma - q} \right) + \frac{\lambda_q}{2} \left( \frac{\zeta^2}{u^2} - \frac{y^2}{w^2} \right) + \frac{2\lambda_q - 1}{2} \left( \frac{y}{\lambda_q - 1} + \frac{\zeta}{\lambda_q} \right) + \log \frac{(1 - q)\Phi \left( \frac{u}{\sqrt{\lambda_q}} + \frac{\zeta}{u} \sqrt{\lambda_q} \right)}{q\Phi \left( -\frac{w}{\sqrt{\lambda_q}} + \frac{y}{w} \sqrt{\lambda_q} \right)} = 0. \quad (101)$$

697 A direct calculation shows that, at  $wu = \frac{\gamma - q}{q}$ , the terms up to the last logarithm vanish. We  
 698 now show that the last one can be written as  $(wu - \frac{\gamma - q}{q})h$  for some function  $h$ .

699 Indeed, using conditions (93) and (89) we have

$$\frac{(1 - q)\phi(-w, -y, q)}{q\Phi(-w, -y, q)} - \frac{\phi(u, \zeta, q)}{\Phi(u, \zeta, q)} = \frac{(u + w)\sqrt{\lambda_q}}{uw} \left( \frac{\gamma - q}{q} - uw \right), \quad (102)$$

700 where we have used the abbreviations  $\Phi(u, \zeta, q) := \Phi \left( \frac{u}{\sqrt{\lambda_q}} + \frac{\zeta}{u} \sqrt{\lambda_q} \right)$  and  $\phi(u, \zeta, q) := \phi \left( \frac{u}{\sqrt{\lambda_q}} + \frac{\zeta}{u} \sqrt{\lambda_q} \right)$   
 701 to simplify notation. Therefore,

$$\frac{(1 - q)\Phi(u, \zeta, q)}{q\Phi(-w, -y, q)} = \frac{\phi(u, \zeta, q)}{\phi(-w, -y, q)} + \frac{(u + w)\Phi(u, \zeta, q)\sqrt{\lambda_q}}{uw\phi(-w, -y, q)} \left( \frac{\gamma - q}{q} - uw \right). \quad (103)$$

702 Letting  $\mu_q := (\gamma - q)/q$ , it holds that

$$\frac{\phi(u, \zeta, q)}{\phi(-w, -y, q)} = e^{(\mu_q^2 - (uw)^2)((\lambda_q - 1)^2 u^2 - \lambda_q^2 w^2)/(2\lambda_q u^2 w^2)}. \quad (104)$$

703 Now, due to the series representation of the exponential function we have

$$\frac{\phi(u, \zeta, q)}{\phi(-w, -y, q)} = 1 + (\mu_q - uw)h(u, w), \quad (105)$$

where

$$h(u, w) := \frac{q(u + w)\Phi(u, \zeta, q)\sqrt{\lambda_q}}{uw\phi(-w, -y, q)} + \sum_{j=1}^{\infty} \frac{1}{j!} (\mu_q - uw)^{j-1} \left( (\mu_q + uw) \frac{(\lambda_q - 1)^2 u^2 - \lambda_q^2 w^2}{2\lambda_q u^2 w^2} \right)^j. \quad (106)$$

704 Thus, the claim follows by using the series expansion of  $\log(1 + x)$ . Therefore, all the terms  
705 in (101) vanish at  $uw = \mu_q$ .

706 We have just shown that the last logarithm in (101) is equal to zero. Consequently  $q^*$   
707 satisfies

$$\frac{(1 - q)\Phi\left(\frac{u}{\sqrt{\lambda_q}} + \frac{\zeta}{u}\sqrt{\lambda_q}\right)}{q\Phi\left(-\frac{w}{\sqrt{\lambda_q}} + \frac{y}{w}\sqrt{\lambda_q}\right)} = 1. \quad (107)$$

708 At the point  $uw = \mu_q$  we can write

$$\frac{u}{\sqrt{\lambda_q}} + \frac{\zeta}{u}\sqrt{\lambda_q} = \frac{\lambda_q w - (\lambda_q - 1)u}{\sqrt{\lambda_q}} = \frac{w}{\sqrt{\lambda_q}} - \frac{y}{w}\sqrt{\lambda_q}, \quad (108)$$

709 which in turn implies that

$$\Phi\left(\frac{\lambda_q w - (\lambda_q - 1)u}{\sqrt{\lambda_q}}\right) = q^*. \quad (109)$$

710 Let  $\hat{q} := \Phi^{-1}(q^*) = \sqrt{2}\operatorname{erf}^{-1}(2q^* - 1)$ , for  $\operatorname{erf}^{-1}$  the inverse error function. Then it holds that

711  $(\lambda_q w - (\lambda_q - 1)u)/\sqrt{\lambda_q} = \hat{q}$  and using eq. (93) we can solve for  $u^*$ ,  $w^*$  in terms of  $\hat{q}$ , yielding

$$\begin{aligned} u^* &= \sqrt{\lambda_q} \left( \frac{\phi(\hat{q})}{q^*} + \hat{q} \right), \\ w^* &= \frac{1}{\sqrt{\lambda_q}} \left( (\lambda_q - 1) \frac{\phi(\hat{q})}{q^*} + \lambda_q \hat{q} \right). \end{aligned} \quad (110)$$

712 The final condition for  $q^*$  at the saddle point reduces to substitute the expressions above into  
713 the condition  $uw = \mu_q$ , which finally reads

$$\frac{\gamma}{q^*} = 1 + \left( \frac{\phi(\Phi^{-1}(q^*))}{q^*} + \Phi^{-1}(q^*) \right) \left( \frac{\phi(\Phi^{-1}(q^*))}{q^*} (\lambda_{q^*} - 1) + \Phi^{-1}(q^*) \lambda_{q^*} \right). \quad (111)$$

714 The case  $\rho = 0$  for invasibility is similar, and simpler.

## 715 Level Curves

716 Eq. (111) gives a very good approximation to the level curves on the  $(\rho, \gamma)$  plane mapping  
717 to constant mean fraction of survivors  $q = m/n$ . This implicit condition can be rewritten  
718 equivalently as

$$\gamma = q + \Phi^{-1}(q)H(q) + \frac{n\rho H(q)^2}{1 - \rho}, \quad (112)$$

719 where  $H(q) := \phi(\Phi^{-1}(q)) + q\Phi^{-1}(q)$ . This condition is compared with simulation results in  
720 Fig. 3 of the main text (right panel).

## 721 4 Total biomass distribution at endpoints

722 The proof of independence of invasibility and feasibility (section 3) also shows that, for any  
723 fixed size  $m$  of a subset of species and total biomass  $w$ , we have that  $\Pr(\mathbf{z}_{n-m} < \mathbf{0}_{n-m} | \mathbf{x}_m >$   
724  $\mathbf{0}_m, W = w) = \Pr(\mathbf{z}_{n-m} < \mathbf{0}_{n-m} | W = w)$ . This remark, together with the independence of  
725  $W$  and  $\mathbf{x}_m > \mathbf{0}_m$  (feasibility), helps us derive the distribution of total biomass. To simplify  
726 notation we do not rescale the interaction matrix by  $\ell$  (as shown in section 6 this would  
727 amount to a rescaling of total biomass  $w \rightarrow \ell w$ ). The cdf for the random variable  $W$  is  
728 precisely

$$\Pr(W < w) = \sum_{m=0}^n \binom{n}{m} P_a(m, n) \Pr(W < w | m), \quad (113)$$

729 where  $\Pr(W < w|m)$  is the probability that  $W < w$  conditional on the  $m$ -species endpoint is  
 730 feasible and non-invasible. Thus,

$$\begin{aligned} \Pr(W < w|m) &= \frac{\Pr(W < w, \mathbf{x}_m > \mathbf{0}_m, \mathbf{z}_{n-m} < \mathbf{0}_{n-m})}{P_a(m, n)} \\ &= \frac{\Pr(W < w, \mathbf{z}_{n-m} < \mathbf{0}_{n-m} | \mathbf{x}_m > \mathbf{0}_m) P_f(m)}{P_a(m, n)} \\ &= \frac{\Pr(W < w, \mathbf{z}_{n-m} < \mathbf{0}_{n-m}) P_f(m)}{P_a(m, n)}, \end{aligned} \quad (114)$$

the last equality following from the statement in the paragraph above. Now, using the notations introduced in the last section, it holds that

$$\begin{aligned} \Pr(W < w, \mathbf{z}_{n-m} < \mathbf{0}_{n-m}) &= \int_0^\infty dug(\nu', u) \Theta(u - w^{-1} \mathbf{1}_m^T \Sigma_{11}^{-1} \mathbf{1}_m) \\ &\quad \times Q_{n-m}^-(\mathbf{1}_{n-m} - \Sigma_{21} \Sigma_{11}^{-1} \mathbf{1}_m, u^{-1} \mathbf{1}_m^T \Sigma_{11}^{-1} \mathbf{1}_m \Sigma_{22.1}). \end{aligned} \quad (115)$$

Hence, using (114) and  $P_a(m, n) = P_f(m) P_{ni}(m, n)$ , the probability density function of the biomass distribution can be expressed as

$$\begin{aligned} g_a(w) &= \sum_{m=0}^n \binom{n}{m} P_f(m) \frac{\partial \Pr(W < w, \mathbf{z}_{n-m} < \mathbf{0}_{n-m})}{\partial w} \\ &= \sum_{m=0}^n \binom{n}{m} \frac{\tilde{w}}{w} P_f(m) g(\nu', \tilde{w}) Q_{n-m}^-(\mathbf{1}_{n-m} - \Sigma_{21} \Sigma_{11}^{-1} \mathbf{1}_m, \tilde{w}^{-1} \mathbf{1}_m^T \Sigma_{11}^{-1} \mathbf{1}_m \Sigma_{22.1}), \end{aligned} \quad (116)$$

731 where  $\tilde{w} := w^{-1} \mathbf{1}_m^T \Sigma_{11}^{-1} \mathbf{1}_m$ . Fig. 12 shows the comparison of (116) with simulations for the  
 732 constant correlation case in the case in which the interaction matrix is rescaled by the number  
 733 of traits.

Going back to re-scaling the interaction matrix by  $\ell$ , total biomass transforms as  $w \rightarrow \ell w$ . By the above calculation and a change of variables  $w \rightarrow \tilde{w}$ , the moments of the distribution of  $\ell W$  conditional to  $m$  coexisting species are given by

$$\begin{aligned} \mathbb{E}[(\ell W)^k | m] &= \int_0^\infty d(\ell w) (\ell w)^k g_a(w|m) = \frac{1}{P_{ni}(m, n)} \int_0^\infty dw g(\nu', w) \\ &\quad \times (\ell w^{-1} \mathbf{1}_m^T \Sigma_{11}^{-1} \mathbf{1}_m)^k Q_{n-m}^-(\mathbf{1}_{n-m} - \Sigma_{21} \Sigma_{11}^{-1} \mathbf{1}_m, w^{-1} \mathbf{1}_m^T \Sigma_{11}^{-1} \mathbf{1}_m \Sigma_{22.1}). \end{aligned} \quad (117)$$

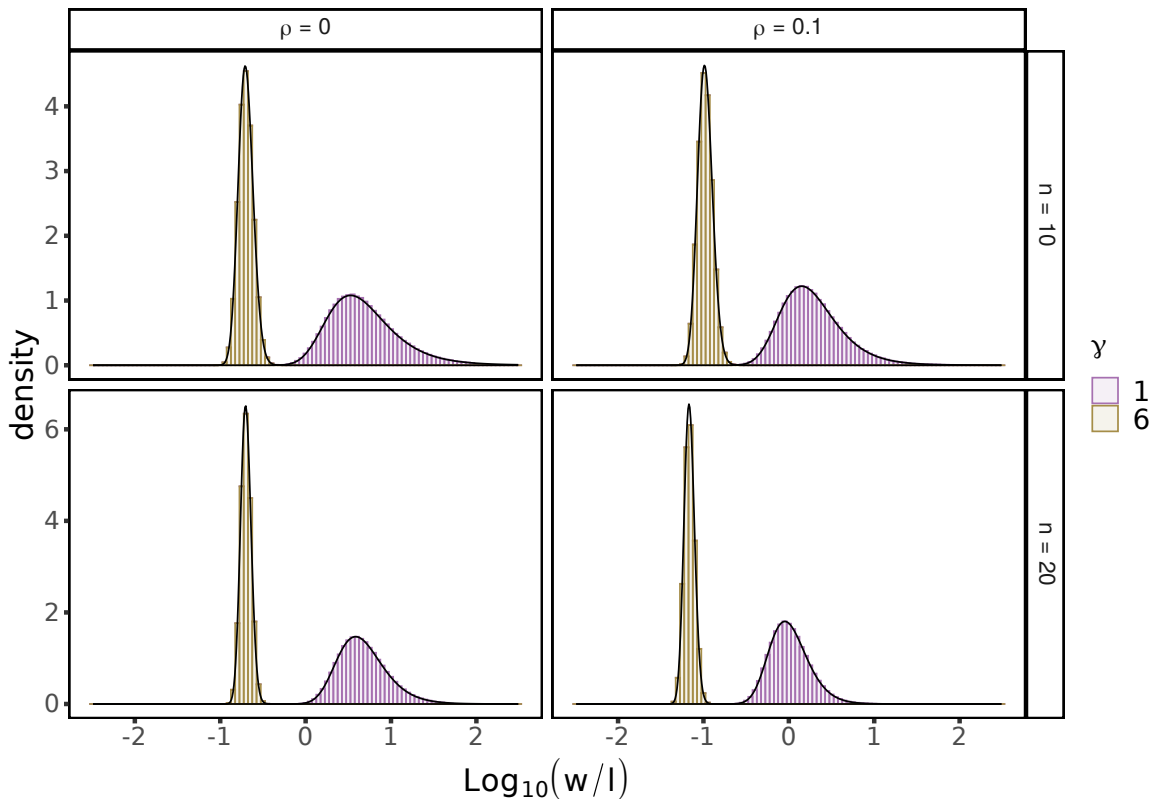

Figure 12: **Distribution of the total biomass  $w$  of the survival community as a function of the ratio  $\gamma$  of number of traits  $k$  to number of species  $n$  for different *constant* correlation matrices.** The simulations were done with  $n = 10, 20$  species. Histograms are simulations and black lines are the numerical integration of (116).

734 By the saddle point calculation done while computing the expected number of survivors we can  
 735 approximate the mean of  $\ell W|m$  for  $\rho \geq 0$ ,  $m = nq$  and  $\ell = \gamma n$  as follows: the above integral  
 736 satisfies (86) up to a multiplication by  $\frac{\gamma}{w^2 q} \mathbf{1}_m^T \Sigma_{11}^{-1} \mathbf{1}_m$  —observe the rescaling in (83). Hence  
 737 the exponent in the integral does not change so, at the solution  $(y_0, w_0)$  of (89), neglecting  
 738 all but the leading order terms we can approximate

$$\mathbb{E}[\ell W|m] \approx \frac{\ell}{(1 - \rho + \rho m)w_0^2}. \quad (118)$$

739 Assuming that the distribution of survivors is highly peaked at the mode, we can approximate  
 740 the mean of  $W$  by the mean conditional at the mode, which we get from Eq. (111):

$$\mathbb{E}[\ell W] \approx \frac{\ell}{(1 - \rho + \rho q^* n)w_0(q^*)^2}. \quad (119)$$



## 741 5 Relative abundances

For an equilibrium attractor  $\mathbf{x}_m$  with  $m$  species, let  $\mathbf{v} := \mathbf{x}_m / \sum_{i=1}^m x_m^i$  be the relative abundance vector. In particular,  $v_m = 1 - \sum_{i=1}^{m-1} v_i =: 1 - \tilde{v}$ . By section 3, Eq. (34), we know that  $\tilde{v}$  follows a multivariate  $t$  distribution, so we can write the distribution function for  $v_m$  conditional on  $\mathbf{x}$  being feasible as

$$\begin{aligned} \Pr(v_m < c | \mathbf{x}_m > \mathbf{0}_m) &= 1 - \Pr(v_m > c | \mathbf{x} > \mathbf{0}_m) \\ &= 1 - \frac{1}{P_f(m)} \int_0^\infty \text{dug}(\nu, u) \Pr(\mathbf{y}_u > \mathbf{0}_{m-1}, \mathbf{1}_{m-1}^T \mathbf{y}_u < 1 - c) \end{aligned} \quad (120)$$

with  $\nu = \ell - m + 2$ . The independence of  $\tilde{v}$  and invasibility gives us the distribution of  $v$  conditional to  $\mathbf{x}_m$  being an attractor of the system with  $m$  out of  $n$  survivors. Let  $\mathbf{z}_{n-m}$  be defined as in section 3. Then

$$\begin{aligned} \Pr(v_m < c | m) &= \frac{\Pr(v_m < c, \mathbf{x} > \mathbf{0}_m, \mathbf{z}_{n-m} < \mathbf{0}_{n-m})}{P_a(m, n)} \\ &= \frac{\Pr(\mathbf{z}_{n-m} < \mathbf{0}_{n-m} | \mathbf{x} > \mathbf{0}_m, v_m < c) \Pr(v_m < c | \mathbf{x} > \mathbf{0}_m)}{P_{ni}(m, n)} = \Pr(v_m < c | \mathbf{x} > \mathbf{0}_m), \end{aligned} \quad (121)$$

742 where we have used the independence of feasibility and invasibility,  $P_a(m, n) = P_f(m)P_{ni}(m, n)$ .

In case of a constant correlation  $\rho \geq 0$ , all species are equivalent so any surviving species  $i$  has the same distribution as  $x_m$ . Applying the same derivation as for the feasibility case, and using the notation of the saddle point calculation with  $m = qn$  (see Eq. (90)), we get

$$\begin{aligned} \Pr(v_m < c | m) &= 1 - \frac{i\sqrt{\lambda_q}}{\sqrt{2\pi}P_f(m)} \int_0^\infty \text{dug}(\nu, u) u^{-1/2} \int_\Gamma d\zeta e^{\frac{\lambda_q \zeta^2}{2u}} \\ &\quad \times \Phi\left(\sqrt{\frac{u}{n\lambda_q}} + \zeta\sqrt{\frac{\lambda_q}{nu}}\right)^{m-1} \Phi\left(\sqrt{\frac{u}{n\lambda_q}} - c\sqrt{\frac{nu}{\lambda_q}} + \zeta\sqrt{\frac{\lambda_q}{nu}}\right). \end{aligned} \quad (122)$$

743 Letting  $\tilde{c} = cn$ , the integral above can be approximated by the same saddle point calculation

744 we did for feasibility (section 3) up to a multiplication factor given by

$$\frac{\Phi\left(\frac{u}{\sqrt{\lambda_q}}(1 - \tilde{c}q) + \frac{\zeta}{u}\sqrt{\lambda_q}\right)}{\Phi\left(\frac{u}{\sqrt{\lambda_q}} + \frac{\zeta}{u}\sqrt{\lambda_q}\right)}. \quad (123)$$

745 Thus, for  $(u, \zeta)$  satisfying the system of equations (93) with  $\zeta$  real, we get an approximation  
 746 for the distribution function by neglecting all but the leading terms:

$$\Pr(v_m < c|m) = 1 - \frac{\Phi\left(\frac{u}{\sqrt{\lambda_q}}(1 - \tilde{c}q) + \frac{\zeta}{u}\sqrt{\lambda_q}\right)}{\Phi\left(\frac{u}{\sqrt{\lambda_q}} + \frac{\zeta}{u}\sqrt{\lambda_q}\right)}. \quad (124)$$

747 This distribution was compared to simulations in the main text (Fig 4, left panel).

## 748 6 Invariant Lotka-Volterra operations

749 In this section we detail the operations that can be performed in a symmetric stable GLV  
 750 system without changing the subset of coexisting species.

751 Let  $\mathbf{r} \in \mathbb{R}^n$  be the vector of growth rates, and  $A \in \mathbb{R}^n$  a symmetric and positive definite  
 752 interaction matrix. Let  $\{S\}_m \subset \{1, \dots, n\}$  be the *unique* subset of  $m$  species that form the  
 753 attractor, with vector of densities  $\mathbf{x} = (x_i)$ . Then  $\mathbf{x}$  satisfies:

$$\begin{cases} x_i > 0, & i \in \{S\}_m, \\ x_i(A\mathbf{x} + \mathbf{r})_i = 0, & \text{for all } i, \\ (A\mathbf{x} + \mathbf{r})_i < 0, & i \notin \{S\}_m. \end{cases} \quad (125)$$

754 Then we can easily see the effect of the following operations on  $A$  and  $\mathbf{r}$  on the attractor  $\mathbf{x}$ .  
 755 Let  $\kappa > 0$  and  $D$  a positive diagonal matrix. The operations that maintain the identity of the  
 756 species in the endpoint are:

757 (a)  $A \rightarrow \kappa A$ : then  $\mathbf{x} \rightarrow \kappa^{-1}\mathbf{x}$ .

758 (b)  $\mathbf{r} \rightarrow \kappa\mathbf{r}$ : Then  $\mathbf{x} \rightarrow \kappa\mathbf{x}$ .

759 (c)  $A \rightarrow DAD, \mathbf{r} \rightarrow D\mathbf{r}$ : Then  $\mathbf{x} \rightarrow D^{-1}\mathbf{x}$ .

760 After any of these operations, the set of coexisting species remains *unchanged*.

761 Additionally, in the case of  $\mathbf{r} = \kappa\mathbf{1}_n$ , for  $\kappa > 0$ , we can perform an additional operation:

$$A \rightarrow B = A + \mu\mathbf{1}_n\mathbf{1}_n^T. \quad (126)$$

762 Then shifting

$$\mathbf{x} \rightarrow \mathbf{y} = \frac{\kappa \mathbf{x}}{1 + \mu \mathbf{1}_n^T \mathbf{x}}, \quad (127)$$

763 by direct computation of conditions (125) we see that  $\mathbf{y}$  is a non-invasible equilibrium. If we  
 764 additionally restrict  $\mu > 0$ ,  $\mathbf{y}$  satisfies the feasibility property and  $B$  is positive definite so  
 765 again the support  $\{S\}_m$  of the attractor is unchanged.

## 766 7 Varying growth rates

767 In this section we analyze the effect that growth rates are not equal for all species. By  
 768 continuity, we expect our results to hold when  $\mathbf{r} = \mathbf{1}_n + \boldsymbol{\epsilon}_n$  and  $\|\boldsymbol{\epsilon}_n\| \ll 1$  if  $\ell \geq n$ . In case  
 769  $\ell < n$ , the matrix  $A$  is singular and the solutions of the system can be unbounded. To correct  
 770 for that, assume that  $A = A + \mu \mathbf{1}_n \mathbf{1}_n^T$  where  $\mu$  is a sufficiently large enough perturbation so  
 771 that  $A_{ij} + \mu > 0$ . In this case  $-(A + \mu \mathbf{1}_n \mathbf{1}_n^T)$  is negative semidefinite and dissipative [19], so the  
 772 solutions are always bounded. Still, the solutions can be degenerate in the sense that there is  
 773 a hyperplane of non-invasible equilibria towards which the system converges. By perturbing  
 774 the growth rates we can correct for that. Assume now that  $\mathbf{r} = \mathbf{1}_n + \mathcal{N}(0, \sigma^2)$ , where  $\sigma \ll 1$   
 775 and that  $\hat{\mathbf{x}}$  is a saturated rest point of the system (which exists because  $A_{ij} + \mu > 0$ ). Without  
 776 lost of generality, we can assume that the first  $m$  species survive. Then, we have

$$A \hat{\mathbf{x}} + \mathbf{r} = \begin{pmatrix} \mathbf{0}_m \\ \mathbf{z} \end{pmatrix}. \quad (128)$$

777 For  $\mathbf{z} \in \mathbb{R}_-^{n-m}$ , if any  $z_i = 0$ , then for the system considering only the species  $\{1, \dots, m\} \cup \{i\}$   
 778 we have that the restriction of  $\mathbf{r}$  to this subsystem is contained on a plane of dimension  
 779  $m < m + 1$ . Since the distribution of  $\mathbf{r}$  is continuous, the probability of this event is 0 almost  
 780 surely. Hence  $z_i < 0$  for any  $i$  so that invasibility is *strict*. Furthermore, the same argument  
 781 shows that the rank of  $A$  restricted to the survivor subset must be  $m$ , i.e. the restriction of  
 782 matrix  $A$  to the set of coexisting species is *full rank*.

783 Apply the usual Lyapunov function for the system [19],

$$V(\mathbf{x}) = - \sum_{i=1}^n (\hat{x}_i \log x_i - x_i). \quad (129)$$

784 Defined for any  $\mathbf{x} \in \mathbb{R}_+^n$ , with a global minimum at  $\mathbf{x} = \hat{\mathbf{x}}$  and radially unbounded, then we  
 785 have

$$\dot{V}(\mathbf{x}) = - \sum_{ij} A_{ij}(x_i - \hat{x}_i)(x_j - \hat{x}_j) + \sum_i (x_i - \hat{x}_i) \left( r_i + \sum_j a_{ij} \hat{x}_j \right). \quad (130)$$

786 The first sum is non-negative since the matrix is negative semidefinite, and the second is  
 787 non-positive and is negative unless  $x_i = 0$  for any  $i > m$ . Given that the restriction of  $A$  to  
 788 the survivors subset is full rank then  $\dot{V} = 0$  only at  $\hat{\mathbf{x}}$ , which implies that  $\hat{\mathbf{x}}$  is globally stable  
 789 and, in particular, is unique [19].

790 In these cases, while our previous analyses are not exact because of the perturbations  
 791 introduced in the vector of rates  $\mathbf{r}$  and in interaction coefficients ( $A \rightarrow A + \mu \mathbf{1}_n \mathbf{1}_n^T$ ), we can  
 792 apply the same machinery that we have developed to provide approximations. This works  
 793 because we know that the shift of  $A \rightarrow A + \mu \mathbf{1}_n \mathbf{1}_n^T$  does not change properties like feasibility  
 794 or invasibility (see section 6). What changes is that the rank of  $A$  goes up by one (see the  
 795 observation below). Forgetting about this, we can use the same machinery as in the non-  
 796 degenerate case: for feasibility this follows because only full rank subsets are considered,  
 797 and the restriction of a singular Wishart to a block of  $m \leq \ell$  subsets is a Wishart matrix.  
 798 Further, the conditional distribution of blocks used for the derivation of the probability of  
 799 non-invasibility holds in the non-degenerate case too [7].

800 **Observation.** The rank of  $B = A + \mu \mathbf{1}_n \mathbf{1}_n^T$  is equal to the rank of  $A$  plus one. Indeed,  
 801 let  $\mathbf{w} \in \ker B$ , then  $\mathbf{w}^T B \mathbf{w} = \mathbf{w}^T A \mathbf{w} + \mu (\mathbf{1}_n^T \mathbf{w})^2 = 0$ , hence  $\mathbf{w} \in \ker A \cap \mathbf{1}_n^\perp$ , and similarly  
 802 any  $\mathbf{w} \in \ker A \cap \mathbf{1}_n^\perp$  is in the kernel of  $B$ , hence  $\ker B = \ker(A \cap \mathbf{1}_n^\perp)$ . Unless  $\ker A \subset \mathbf{1}_n^\perp$ ,  
 803  $\dim(\ker B) = \dim(\ker A) - 1$ , so the rank increases by one.

804 Consider then  $A = CC^T$  for  $C \in \mathbb{R}^{n \times \ell}$ , and let  $\{\mathbf{C}_i\}$  be the set of columns of matrix  
 805  $C$ . Then  $\ker A$  is simply  $U^\perp = \{\mathbf{C}_i\}^\perp$ . As each column  $\mathbf{C}_i$  is sampled independently from  
 806 a continuous distribution then  $W = \{\mathbf{C}_1, \dots, \mathbf{C}_\ell, \mathbf{1}_n\}$  is a linearly independent set almost  
 807 surely, then  $\dim W^\perp = n - \ell - 1$ . Since  $W^\perp = U^\perp \cap \mathbf{1}_n^\perp$ , and  $\dim U^\perp = n - \ell$  then  $U^\perp$  cannot  
 808 be contained in  $\mathbf{1}_n^\perp$ .

809 Observe that the restriction on the size of the subsystems set  $\gamma + 1/n$  as an upper bound  
 810 for the mode  $q^*$ . In the singular case it may happen that  $q^*$  satisfying eq. (111) is bigger than  
 811  $\gamma + 1/n$ . Given that we expect the function to be unimodal and increasing with  $q$ , then our  
 812 approximation for the mode in those cases is simply  $\gamma + 1/n$ .

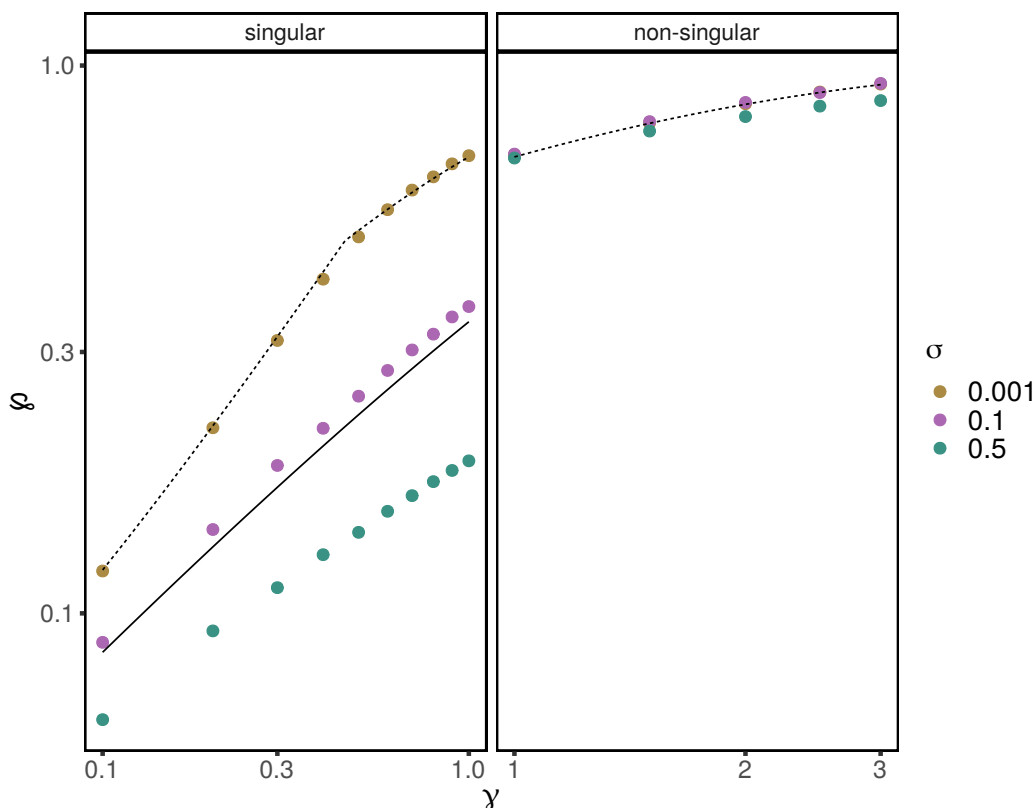

Figure 13: **Fraction of survivors under distinct levels of growth rate variability.** Dots mark the average values over simulations with  $r \sim \mathcal{N}(1, \sigma^2)$  and  $A \sim \mathcal{W}_\ell(I_n, n)$ . In the singular case, the matrix  $A$  was perturbed by  $A \rightarrow A + (b + 0.01)\mathbf{1}_n\mathbf{1}_n^T$  for  $b = -\min(A)$ . Dotted lines represent our analytical predictions assuming  $\sigma = 0$ . By Section 6 the shift in  $A$  does not affect  $\varphi$  when  $\sigma = 0$ . The initial decrease of  $\varphi$  in the singular case is due to this property not holding when  $\sigma \neq 0$ . The solid line is our analytical prediction for  $\sigma = 0$ , when  $A \sim \mathcal{W}_\ell(\Sigma, n)$ .  $\Sigma$  is a constant correlation matrix with  $\rho = \frac{2\sigma_\ell + 0.01}{1 + 2\sigma_\ell + 0.01}$  and  $\sigma_\ell = \sqrt{\overline{V}(A_{ij})}$  for  $i \neq j$  which in this case is simply  $\frac{1}{\sqrt{\ell}}$ .

## 813 References

- 814 [1] S. Allesina and S. Tang. The stability–complexity relationship at age 40: a random  
815 matrix perspective. *Population Ecology*, 57(1):63–75, 2015.
- 816 [2] S. Allesina, J. Grilli, G. Barabás, S. Tang, J. Aljadeff, and A. Maritan. Predicting the  
817 stability of large structured food webs. *Nature communications*, 6(1):1–6, 2015.
- 818 [3] M. Barbier, J.-F. Arnoldi, G. Bunin, and M. Loreau. Generic assembly patterns in  
819 complex ecological communities. *Proceedings of the National Academy of Sciences*, 115  
820 (9):2156–2161, 2018.
- 821 [4] U. Bastolla, M. Lässig, S. C. Manrubia, and A. Valleriani. Biodiversity in model ecosys-  
822 tems, ii: species assembly and food web structure. *Journal of theoretical biology*, 235(4):  
823 531–539, 2005.
- 824 [5] L. R. Belyea and J. Lancaster. Assembly rules within a contingent ecology. *Oikos*, pages  
825 402–416, 1999.
- 826 [6] G. Biroli, G. Bunin, and C. Cammarota. Marginally stable equilibria in critical ecosys-  
827 tems. *New Journal of Physics*, 20(8):083051, 2018.
- 828 [7] T. Bodnar and Y. Okhrin. Properties of the singular, inverse and generalized inverse  
829 partitioned wishart distributions. *Journal of Multivariate Analysis*, 99(10):2389–2405,  
830 2008.
- 831 [8] T. Bodnar and Y. Okhrin. On the product of inverse wishart and normal distributions  
832 with applications to discriminant analysis and portfolio theory. *Scandinavian Journal of*  
833 *Statistics*, 38(2):311–331, 2011.
- 834 [9] H. C. Bravo, S. Wright, K. Eng, S. Keles, and G. Wahba. Estimating tree-structured  
835 covariance matrices via mixed-integer programming. In *Artificial Intelligence and Statis-*  
836 *tics*, pages 41–48, 2009.
- 837 [10] G. Bunin. Ecological communities with lotka-volterra dynamics. *Physical Review E*, 95  
838 (4):042414, 2017.

- 839 [11] M. W. Cadotte, T. J. Davies, and P. R. Peres-Neto. Why phylogenies do not always  
840 predict ecological differences. *Ecological Monographs*, 87(4):535–551, 2017.
- 841 [12] J. A. Capitán, J. A. Cuesta, and J. Bascompte. Statistical mechanics of ecosystem  
842 assembly. *Physical Review Letters*, 103(16):168101, 2009.
- 843 [13] J. A. Capitán, S. Cuenda, and D. Alonso. How similar can co-occurring species be in the  
844 presence of competition and ecological drift? *Journal of The Royal Society Interface*, 12  
845 (110):20150604, 2015. doi: 10.1098/rsif.2015.0604.
- 846 [14] M. A. Freilich and S. R. Connolly. Phylogenetic community structure when competition  
847 and environmental filtering determine abundances. *Global ecology and biogeography*, 24  
848 (12):1390–1400, 2015.
- 849 [15] G. F. Gause. Experimental studies on the struggle for existence: I. mixed population of  
850 two species of yeast. *Journal of experimental biology*, 9(4):389–402, 1932.
- 851 [16] J. Grilli, T. Rogers, and S. Allesina. Modularity and stability in ecological communities.  
852 *Nature communications*, 7(1):1–10, 2016.
- 853 [17] J. Grilli, M. Adorasio, S. Suweis, G. Barabás, J. R. Banavar, S. Allesina, and A. Maritan.  
854 Feasibility and coexistence of large ecological communities. *Nature communications*, 8:  
855 14389, 2017.
- 856 [18] L. Harmon. *Phylogenetic comparative methods: learning from trees*. Self published under  
857 a CC-BY-4.0 license, 2018. URL <https://lukejharmon.github.io/pcm>.
- 858 [19] J. Hofbauer and K. Sigmund. *Evolutionary games and population dynamics*. Cambridge  
859 University Press, 1998.
- 860 [20] J. Hofbauer, K. Sigmund, et al. *Evolutionary games and population dynamics*. Cambridge  
861 university press, 1998.
- 862 [21] C. Hui, H. O. Minoarivelo, and P. Landi. Modelling coevolution in ecological networks  
863 with adaptive dynamics. *Mathematical Methods in the Applied Sciences*, 41(18):8407–  
864 8422, 2018. doi: 10.1002/mma.4612.

- 865 [22] I. Kotsiuba and S. Mazur. On the asymptotic and approximate distributions of the  
866 product of an inverse wishart matrix and a gaussian vector. *Theory of Probability and*  
867 *Mathematical Statistics*, 93:103–112, 2016.
- 868 [23] N. Kraft, W. Cornwell, C. Webb, and D. Ackerly. Trait evolution, community assembly,  
869 and the phylogenetic structure of ecological communities. *The American Naturalist*, 170  
870 (2):271–283, 2007.
- 871 [24] S. A. Levin. Community equilibria and stability, and an extension of the competitive  
872 exclusion principle. *The American Naturalist*, 104(939):413–423, 1970.
- 873 [25] R. Mac Arthur. Species packing, and what competition minimizes. *Proceedings of the*  
874 *National Academy of Sciences*, 64(4):1369–1371, 1969.
- 875 [26] R. MacArthur and R. Levins. The limiting similarity, convergence, and divergence of  
876 coexisting species. *The American Naturalist*, 101(921):377–385, 1967.
- 877 [27] R. M. May. Will a large complex system be stable? *Nature*, 238(5364):413–414, 1972.
- 878 [28] M. M. Mayfield and J. M. Levine. Opposing effects of competitive exclusion on the  
879 phylogenetic structure of communities. *Ecology letters*, 13(9):1085–1093, 2010.
- 880 [29] D. S. Maynard, C. A. Serván, and S. Allesina. Network spandrels reflect ecological  
881 assembly. *Ecology letters*, 21(3):324–334, 2018.
- 882 [30] R. J. Muirhead. *Aspects of multivariate statistical theory*, volume 197. John Wiley &  
883 Sons, 2009.
- 884 [31] R. Nichols. Gene trees and species trees are not the same. *Trends in Ecology & Evolution*,  
885 16(7):358–364, 2001.
- 886 [32] C. A. Serván and S. Allesina. Tractable models of ecological assembly. *bioRxiv*, 2020.  
887 doi: 10.1101/2020.09.02.279943.
- 888 [33] C. A. Serván, J. A. Capitán, J. Grilli, K. E. Morrison, and S. Allesina. Coexistence  
889 of many species in random ecosystems. *Nature Ecology and Evolution*, 2(8):1237–1242,  
890 2018.



- 891 [34] Y. L. Tong. *The multivariate normal distribution*. Springer Science & Business Media,  
892 2012.
- 893 [35] C. Violle, D. R. Nemergut, Z. Pu, and L. Jiang. Phylogenetic limiting similarity and  
894 competitive exclusion. *Ecology letters*, 14(8):782–787, 2011.
- 895 [36] J. Wakely. *Coalescent Theory: An Introduction*. Macmillan Learning, 2016. ISBN  
896 9780974707754.
- 897 [37] C. O. Webb. Exploring the phylogenetic structure of ecological communities: an example  
898 for rain forest trees. *The American Naturalist*, 156(2):145–155, 2000.
- 899 [38] C. O. Webb, D. D. Ackerly, M. A. McPeck, and M. J. Donoghue. Phylogenies and  
900 community ecology. *Annual review of ecology and systematics*, 33(1):475–505, 2002.
- 901 [39] M. G. Weber and A. A. Agrawal. Defense mutualisms enhance plant diversification.  
902 *Proceedings of the National Academy of Sciences*, 111(46):16442–16447, 2014. ISSN 0027-  
903 8424.
- 904 [40] J. Wishart. The generalised product moment distribution in samples from a normal  
905 multivariate population. *Biometrika*, pages 32–52, 1928.
- 906 [41] P. Yodzis. *Introduction to Theoretical Ecology*. Cambridge: Harper & Row, 1989.
- 907 [42] N. Zhao, S. Saavedra, and Y.-Y. Liu. The impact of colonization history on the compo-  
908 sition of ecological systems. *bioRxiv*, 2020. doi: 10.1101/2020.02.26.965715.
